# Supplementary material for: Immune cell dynamics deconvoluted by single-cell RNA sequencing in normothermic machine perfusion of the liver
Source: PubMed Central journal article supplement (PMC10121614; doi:10.1038/s41467-023-37674-8), 2023-04-21
Supplement: 41467_2023_37674_MOESM1_ESM.pdf [file 41467_2023_37674_MOESM1_ESM.pdf]

# Immune cell dynamics deconvoluted by single-cell RNA sequencing in normothermic machine perfusion of the liver

Hautz T<sup>1\*</sup>, Salcher S<sup>2\*</sup>, Fodor M<sup>1\*</sup>, Sturm G<sup>3</sup>, Ebner S<sup>1</sup>, Mair A<sup>2</sup>, Trebo M<sup>2</sup>, Untergasser G<sup>2,4</sup>, Sopper S<sup>2</sup>, Cardini B<sup>1</sup>, Martowicz A<sup>2,4</sup>, Hofmann J<sup>1</sup>, Daum S<sup>2</sup>, Kalb M<sup>2</sup>, Resch T<sup>1</sup>, Krendl F<sup>1</sup>, Weissenbacher A<sup>1</sup>, Otarashvili G<sup>1</sup>, Obrist P<sup>4</sup>, Zelger B<sup>5</sup>, Öfner D<sup>1</sup>, Trajanoski Z<sup>3</sup>, Troppmair J<sup>1</sup>, Oberhuber R<sup>1</sup>, Pircher A<sup>2</sup>, Wolf D<sup>2\*\*</sup>, Schneeberger S<sup>1\*\*</sup>

\* These authors contributed equally

\*\* These authors jointly supervised this work.

## Affiliations

<sup>1</sup> Department of Visceral, Transplant and Thoracic Surgery, Center of Operative Medicine, organLife Laboratory and D. Swarovski Research Laboratory, Medical University of Innsbruck, Innsbruck, Austria

<sup>2</sup> Department of Internal Medicine V, Hematology and Oncology, Comprehensive Cancer Center Innsbruck (CCCI), Medical University of Innsbruck, Innsbruck, Austria

<sup>3</sup> Institute of Bioinformatics, Biocenter, Medical University of Innsbruck, Innsbruck, Austria

<sup>4</sup> Tyrolpath Obrist Brunhuber GmbH, Zams, Austria

<sup>5</sup> Institute of Pathology, Neuropathology and Molecular Pathology, Medical University of Innsbruck, Austria

## Table of contents

|                              |    |
|------------------------------|----|
| Supplementary Figure 1.....  | 4  |
| Supplementary Figure 2.....  | 5  |
| Supplementary Figure 3.....  | 6  |
| Supplementary Figure 4.....  | 7  |
| Supplementary Figure 5.....  | 8  |
| Supplementary Figure 6.....  | 9  |
| Supplementary Figure 7.....  | 10 |
| Supplementary Figure 8.....  | 12 |
| Supplementary Figure 9.....  | 13 |
| Supplementary Figure 10..... | 14 |
| Supplementary Figure 11..... | 15 |
| Supplementary Figure 12..... | 17 |
| Supplementary Figure 13..... | 18 |
| Supplementary Figure 14..... | 19 |
| Supplementary Figure 15..... | 20 |
| Supplementary Figure 16..... | 21 |
| Supplementary Figure 17..... | 22 |
| Supplementary Figure 18..... | 23 |
| Supplementary Figure 19..... | 24 |

Supplementary Figure 20.....25

Supplementary Table 1.....26

Supplementary Table 2.....27

Supplementary Table 3.....28

Supplementary Table 4.....30

Supplementary Table 5.....32

Supplementary Table 6.....36

Supplementary Table 7.....40

Supplementary Table 8.....41

Supplementary Table 9.....42

**Supplementary Figures**

**Supplementary Figure 1**

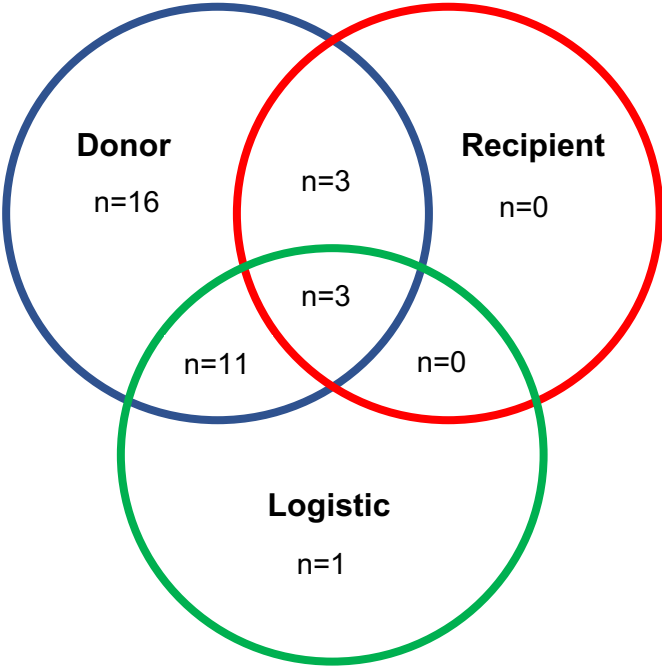

**Supplementary Figure 1. Indications for liver normothermic machine perfusion (n=34 donor livers).**

**Supplementary Figure 2**

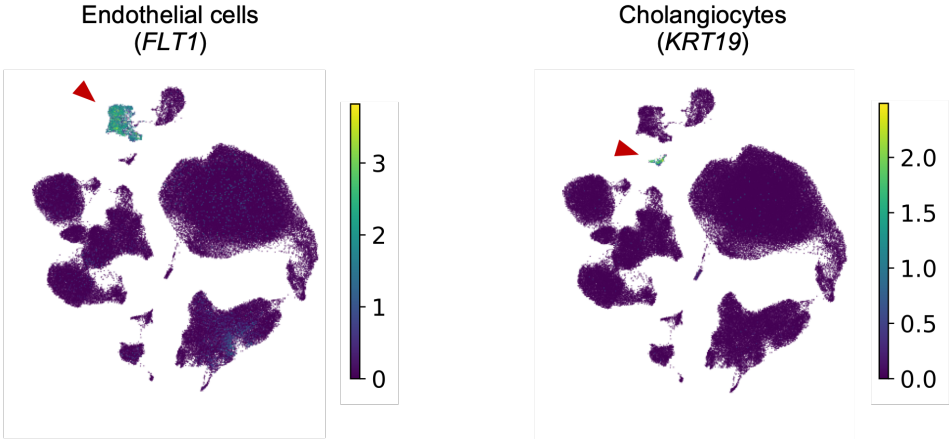

**Supplementary Figure 2. Endothelial cells and cholangiocytes in the scRNASeq liver cell atlas.** UMAP plot of 118,448 single liver cells color-coded for the expression of marker genes for endothelial cells (*FLT1*) and cholangiocytes (*KRT19*; red arrowheads).

**Supplementary Figure 3**

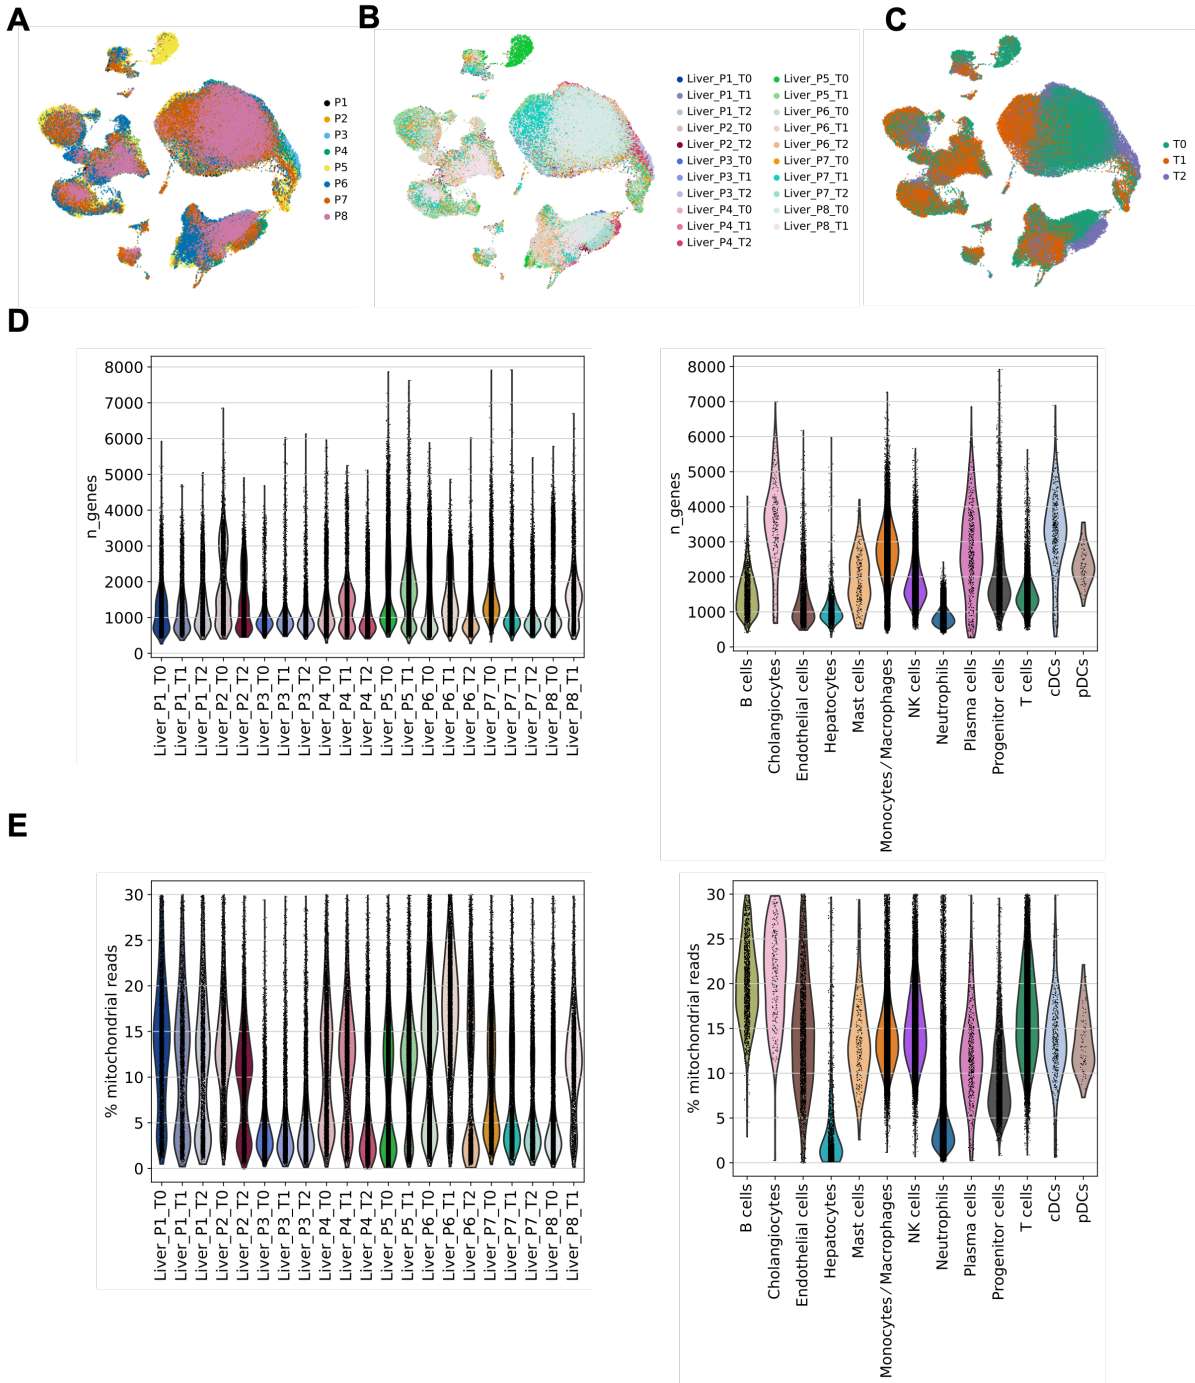

**Supplementary Figure 3. scRNASeq dataset composition and QC metrics.** (A-C) UMAP plot of 118,448 single cells, color-coded by patient (liver 1-8; Supplementary Figure 2A), by each individual biopsy (liver 1-8; time points T0-T2; Fig. S2B), and by time point [pre NMP (T0), at the end of NMP (T1), after reperfusion (T2); Fig. S2C]. (D) Number of detected genes per cell in each individual biopsy (liver 1-8, time points T0-T2; left figure) and in individual cell types (right figure). (E) Relative abundance of detected mitochondrial transcripts (% mitochondrial UMIs) in each individual biopsy (liver 1-8, time points T0-T2; left figure) and in individual cell types (right figure).

## Supplementary Figure 4

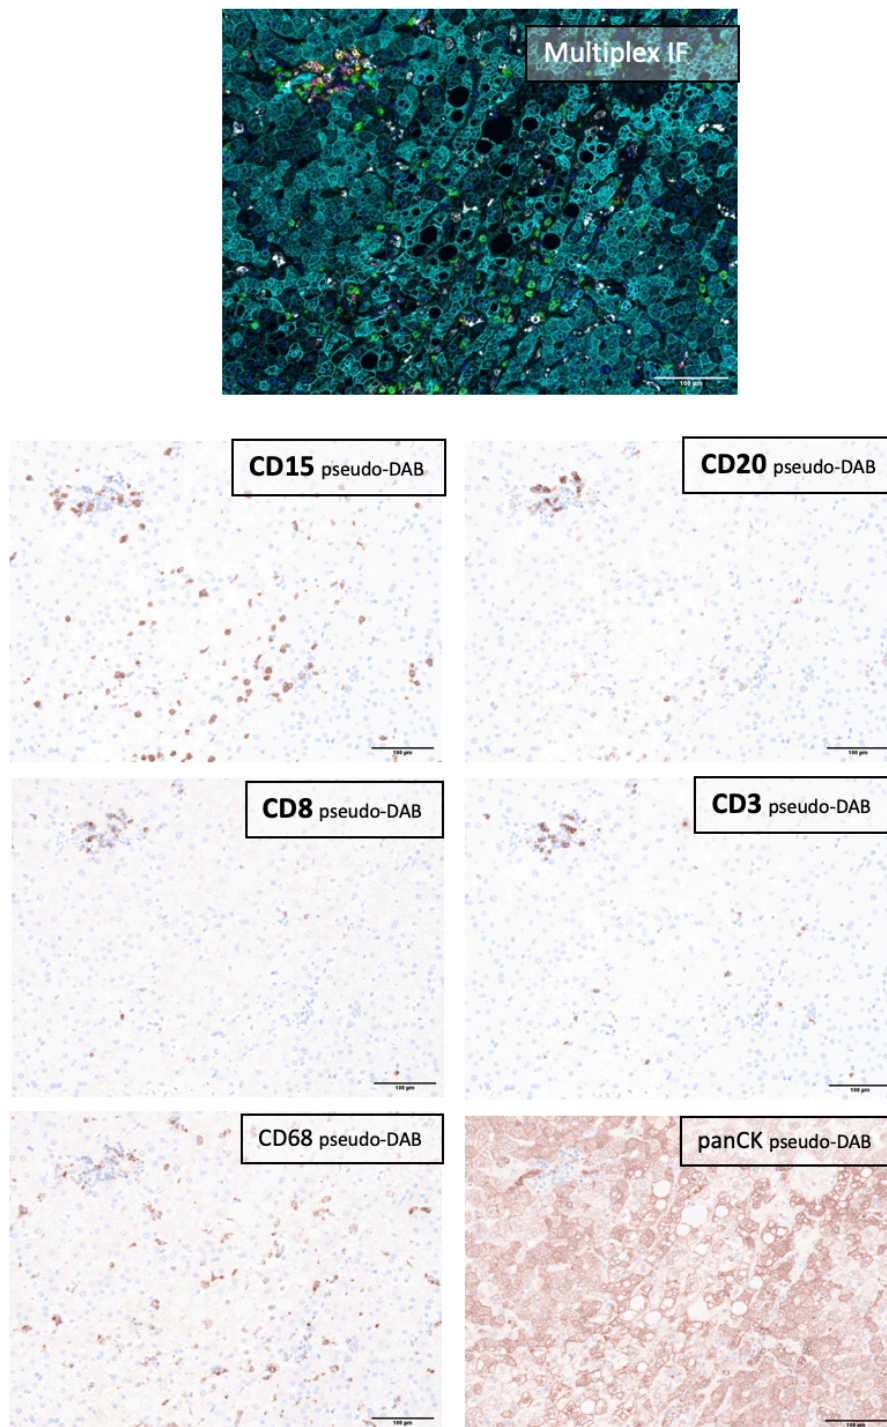

**Supplementary Figure 4. Multiplex image viewed in InForm as simulated DAB IHC single stains (single Pathology views, 'pseudo-DAB') of immune-cell characterizing markers in liver biopsies (n=10) pre NMP (T0).** Antibodies against CD15 (neutrophils), CD20 (B cells), CD8 (cytotoxic T cells), CD3 (T cells), CD68 (macrophages) and panCK (cytokeratin) were used for characterization of the immune cell repertoire in liver biopsy samples and to establish a panel for multiplex immunofluorescence staining (merge immunofluorescent image). Images are displayed at 20x magnification (scale bar = 100 µm).

**Supplementary Figure 5**

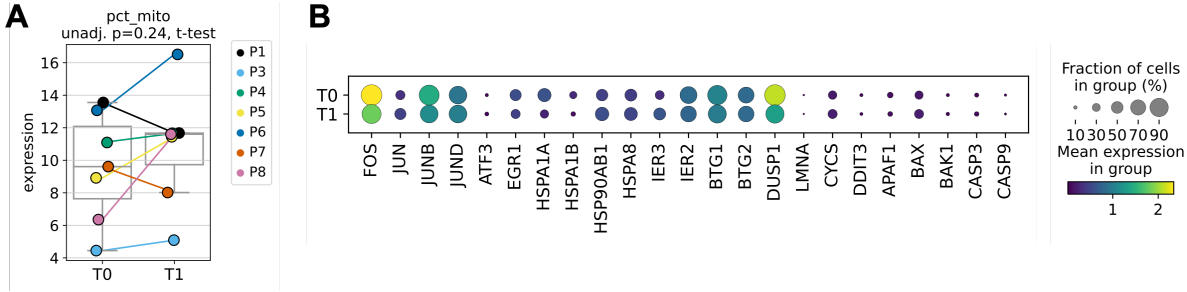

**Supplementary Figure 5. Cell stress in liver allografts before and after NMP.** (A) Relative abundance of detected mitochondrial transcripts (% mitochondrial reads) in each patient (n=7) pre NMP (T0) and at the end of NMP (T1). The central line denotes the median. Boxes represent the interquartile range (IQR) of the data, whiskers extend to the most extreme data points within 1.5 times the IQR. Two-sided t-test, not adjusted for multiple testing. (B) Expression levels of a set of stress- and apoptosis related genes pre (T0) and at the end of (T1) NMP.



## Supplementary Figure 6

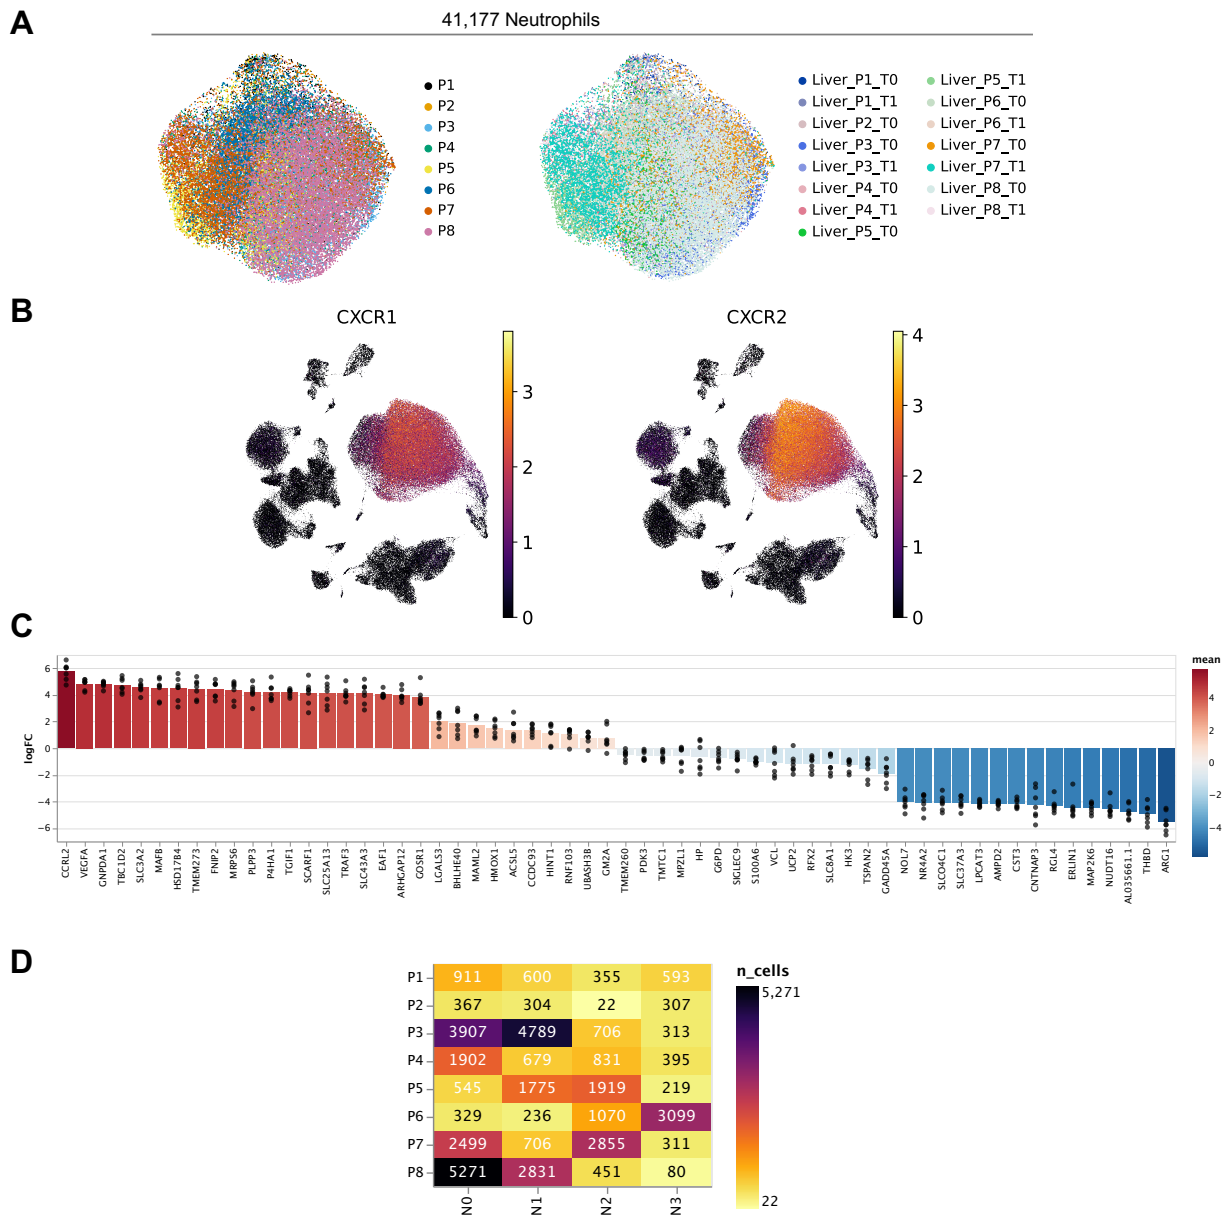

**Supplementary Figure 6. Impact of NMP on neutrophils.** (A) UMAP plot of 41,177 neutrophils, color-coded for each individual patient and biopsy (time points T0-T1). (B) UMAP blots depicting *CXCR1* and *CXCR2* gene expression in levels in individual cell clusters. (C) Top differentially expressed genes between pre (T0) and at the end of (T1) NMP. Each dot represents the fold change of an individual patient (n=7). (D) Neutrophil subclusters by individual patient, the heatmap depicts the number of cells per neutrophil cluster.

## Supplementary Figure 7

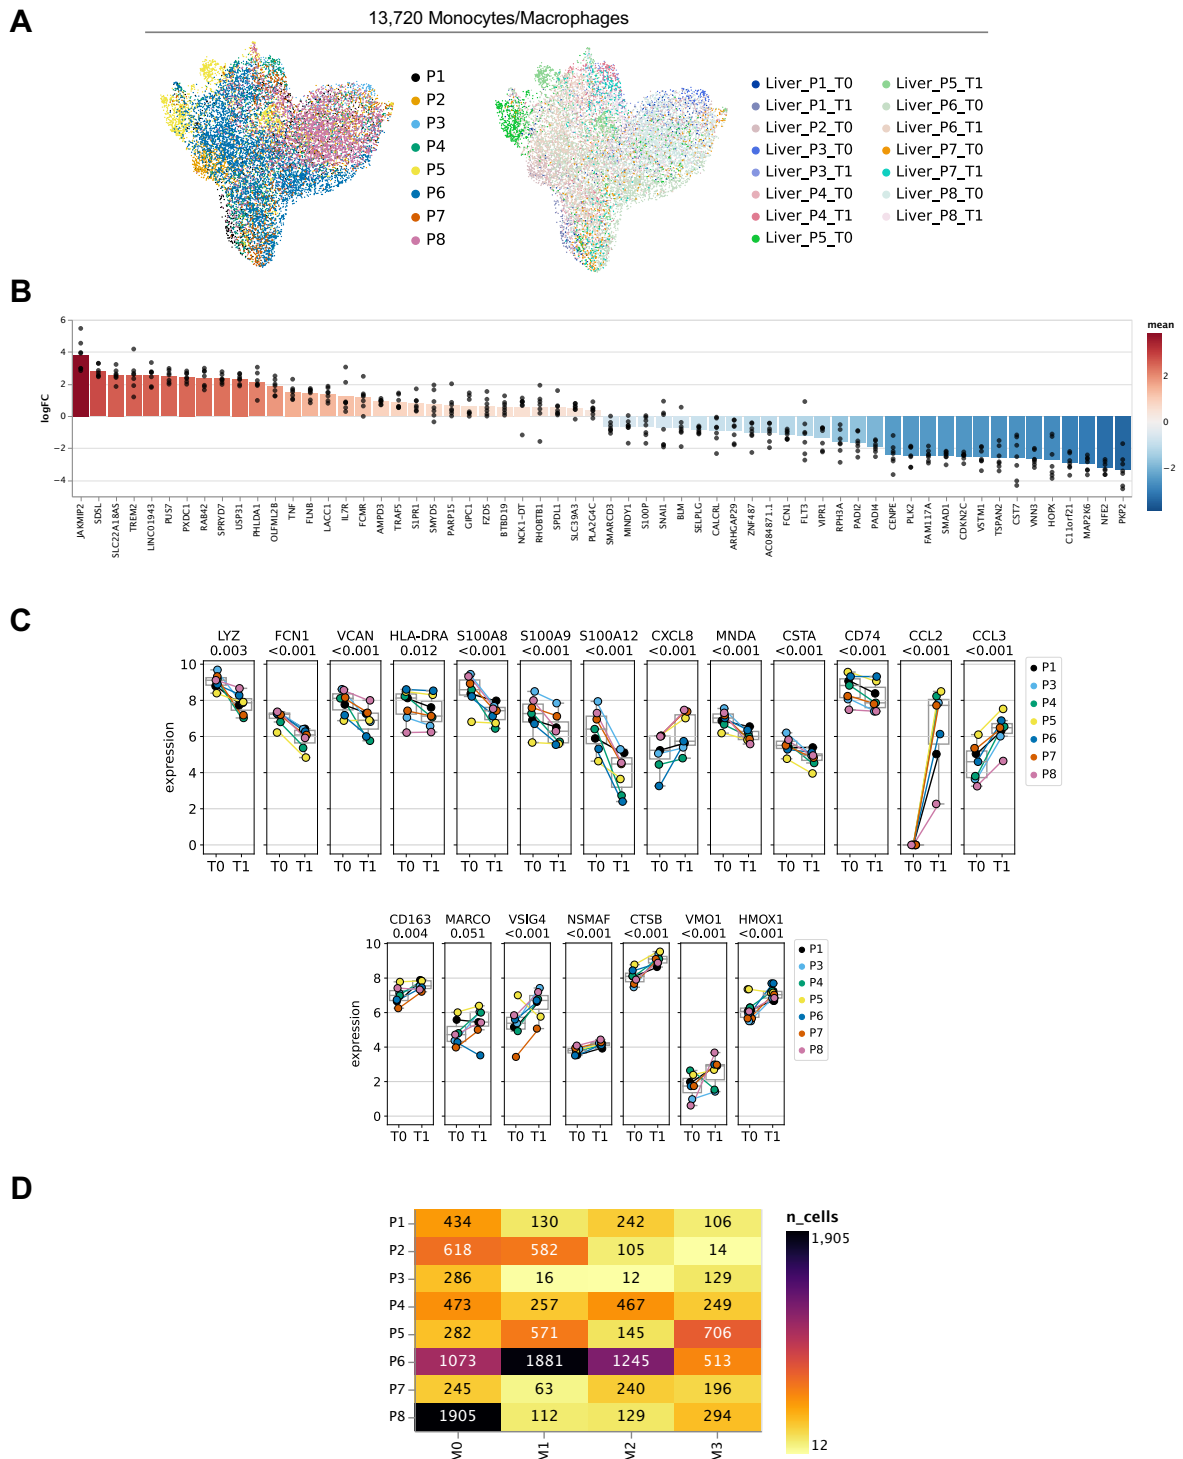

**Supplementary Figure 7. Impact of NMP on monocytes/macrophages.** (A) UMAP plot of 13,720 monocytes/macrophages, color-coded for each individual patient and biopsy (time points T0-T1). (B) Top differentially expressed genes between pre (T0) and at the end of (T1) NMP. Each dot represents the fold change of an individual patient (n=7). (C) Expression of selected marker genes pre (T0) and at the end of (T1) NMP in individual patients (n=7). Upper panel: inflammatory markers, lower panel: tolerogenic markers. The central line denotes the median. Boxes represent the interquartile range (IQR) of the data, whiskers extend to the most

extreme data points within 1.5 times the IQR. Two-sided DESeq2 Wald-test, p-values are adjusted to false-discovery rate (FDR) using independent hypothesis weighting. (D) Monocytes/macrophages subclusters by individual patient, the heatmap depicts the number of cells per subcluster.

## Supplementary Figure 8

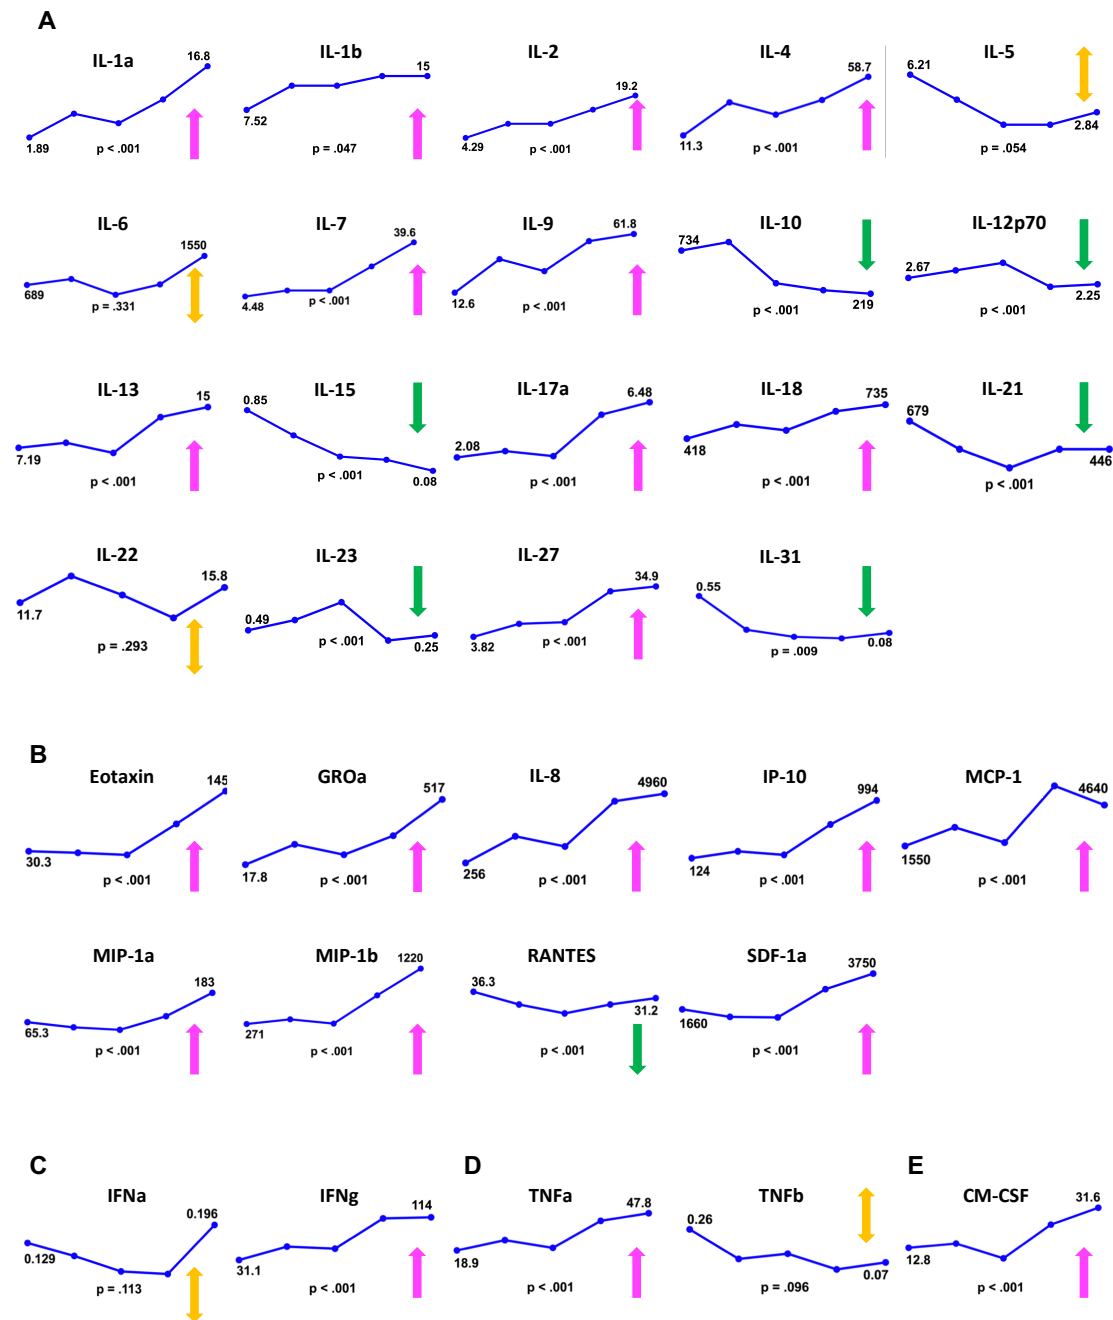

**Supplementary Figure 8. Cytokine perfusate levels at 1h, 4h, 6h, 12h and 24h of NMP (n=26 donor livers subjected to NMP).** (A) Interleukins (B) Chemokines (C) Interferons (D) Tumour necrosis factors (E) Colony stimulating factors. Magenta arrow: levels significantly increase while NMP, yellow arrow: levels do not alter while NMP, green arrow: levels significantly decrease while NMP. X-axis: time, y-axis: protein levels in pg/ml. The Least Squares Means computed using a linear regression model are shown. The p-values refer to the change over time. Absolute values are shown for 1h and 24h NMP. Samples were measured in duplicate and respective results were averaged. If there was a deviation of more than 20% between the duplicates, the higher value was included in the analysis. Any analyte with a concentration outside the linear range of the Luminex assay was excluded from analysis. N=26 biologically independent samples. Source data are provided as a Source Data file.

## Supplementary Figure 9

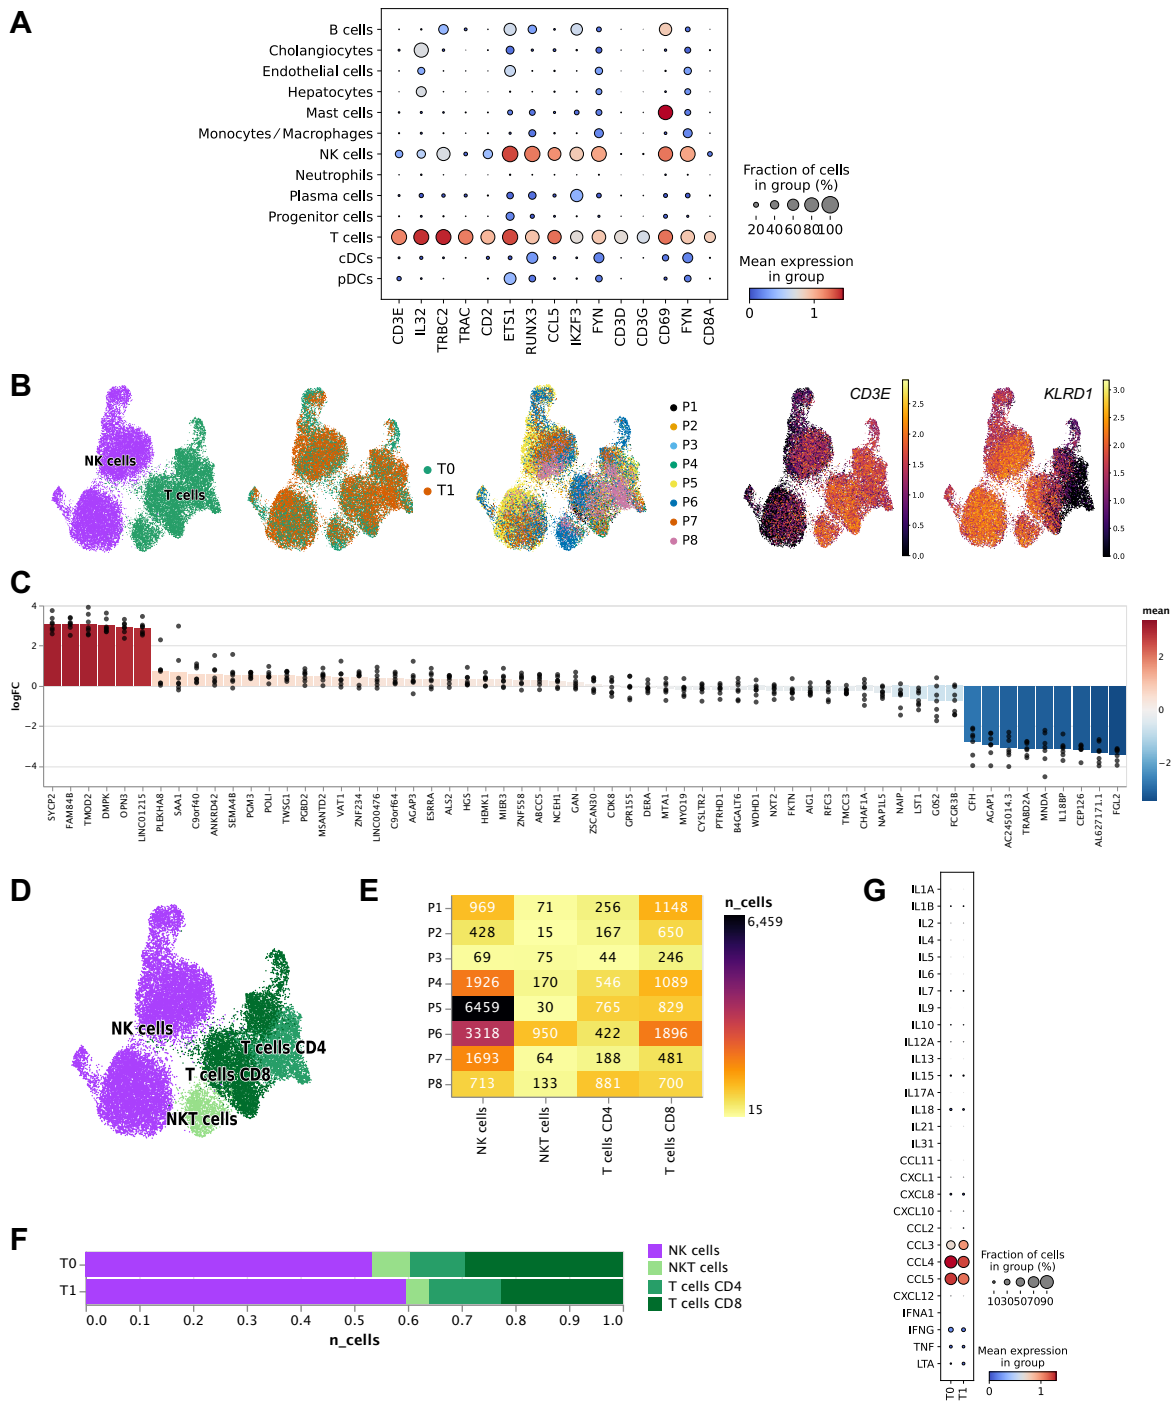

**Supplementary Figure 9. Impact of NMP on T cells and NK cells.** (A) Gene expression levels of top regulated T/NK cell-specific genes in individual cell types. (B) UMAP plots of 11,816 T cells and 15,575 NK cells, color-coded by time point and by patient, as well as of the *CD3E* and *KLRD1* gene expression. (C) Expression of selected marker genes pre (T0) and at the end of (T1) NMP in individual patients (n=7). (D) UMAP of NK cells, NKT cells, T cells CD8, and T cells CD4. (E) T/NK cell subclusters by individual patient, the heatmap depicts the number of cells per subcluster. (F) Relative proportion of NK cells, NKT cells, T cells CD4 and T cells CD8 pre (T0) and at the end of (T1) NMP. (G) Gene expression levels of indicated interleukins/chemokines in T/NK cells pre (T0) and at the end of NMP (T1) as assessed by scRNASeq in eight donor livers.

**Supplementary Figure 10**

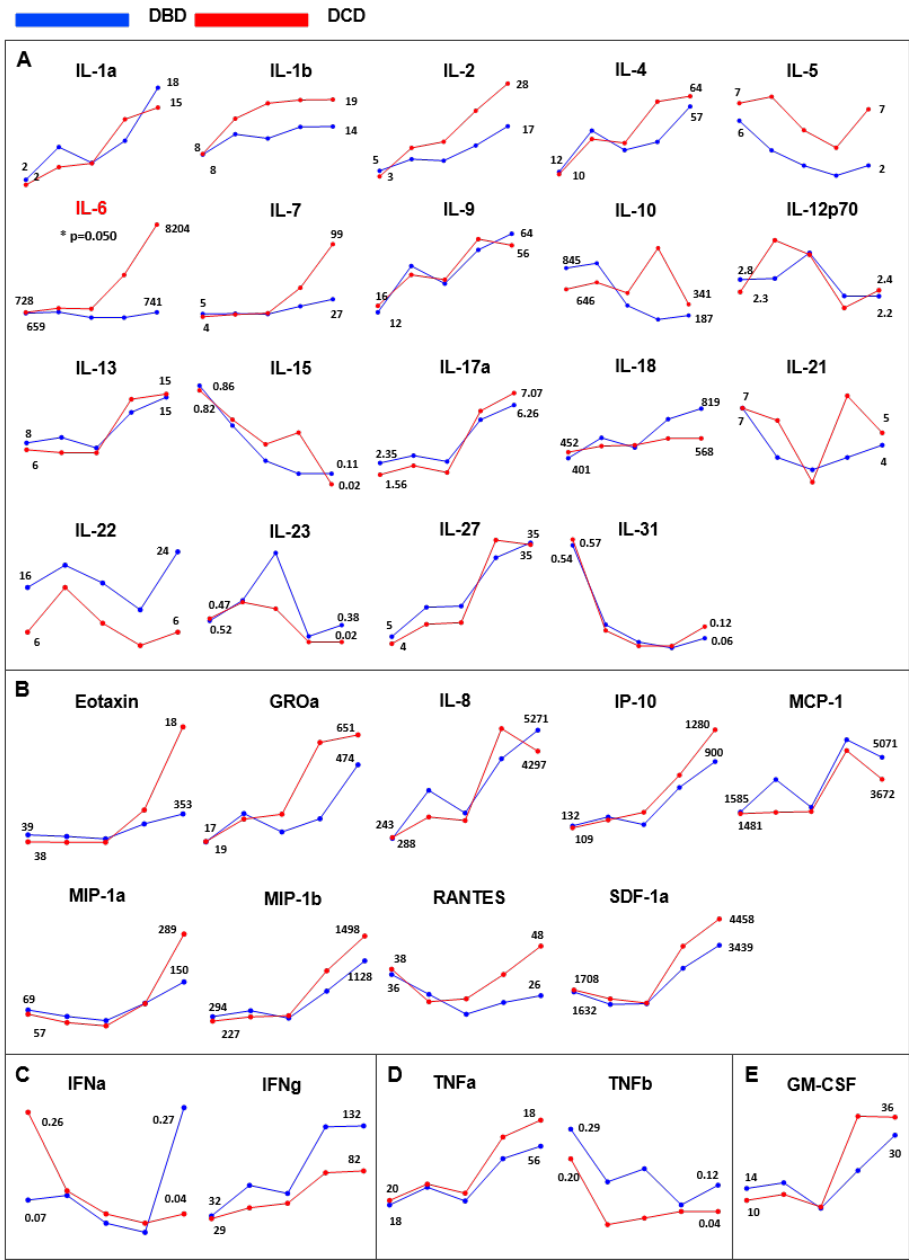

**Supplementary Figure 10. Cytokine levels assessed in perfusate samples at various time points during NMP.** The perfusate of 26 donor livers subjected to NMP was assessed for its inflammatory profile at 1h, 4h, 6h, 12h and 24h of NMP and differences between DBD (n=18) and DCD (n=8) were calculated. Mediators were grouped for (A) interleukins, (B) chemokines, (C) interferons, (D) tumor necrosis factors and (E) colony stimulating factors. X-axis: time, y-axis: protein levels in pg/ml. The Least Squares Means computed using a linear regression model are shown. The p-values refers to the difference between DBD and DCD. Absolute values are shown for 1h and 24h NMP. P-values are given if a significant change of the analyte was observed over perfusion time, and its name is highlighted in red. Non-significant p-values are presented in Table S 8-9. Samples were measured in duplicates and the respective results were averaged. If there was a deviation of more than 20% between the duplicates, the higher value was included in the analysis. Any analyte with a concentration outside the linear range of the Luminex assay was excluded from analysis. N=26 biologically independent samples. Source data are provided as a Source Data file.

**Supplementary Figure 11**

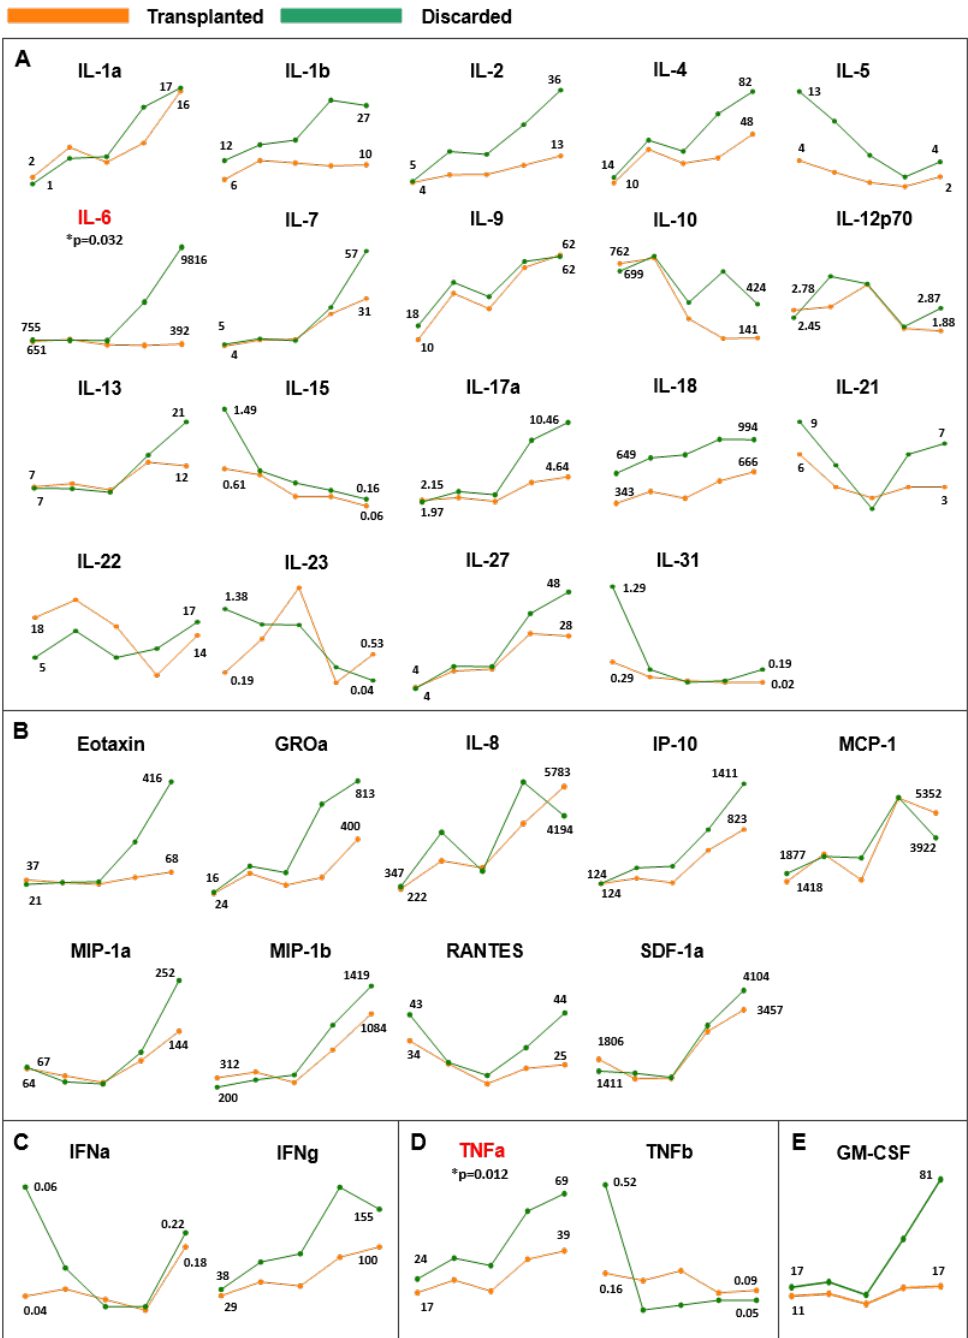

**Supplementary Figure 11. Cytokine levels assessed in perfusate samples at various time points during NMP.** The perfusate of 26 donor livers subjected to NMP was assessed for its inflammatory profile at 1h, 4h, 6h, 12h and 24h of NMP and differences between transplanted (n=18) and discarded (n=8) livers were calculated. Mediators were grouped for (A) interleukins, (B) chemokines, (C) interferons, (D) tumor necrosis factors and (E) colony stimulating factors. X-axis: time, y-axis: protein levels in pg/ml. The Least Squares Means computed using a linear regression model are shown. The p-values refer to the difference between transplanted and discarded. Absolute values are shown for 1h and 24h NMP. P-values are given if a significant change of the analyte was observed over perfusion time, and its name is highlighted in red. Non-significant p-values are presented in Table S 8-9. Samples were measured in duplicates and the respective results were averaged. If there was a deviation of more than 20% between the duplicates, the higher value was included in the analysis. Any

analyte with a concentration outside the linear range of the Luminex assay was excluded from analysis. N=26 biologically independent samples. Source data are provided as a Source Data file.



**Supplementary Figure 12**

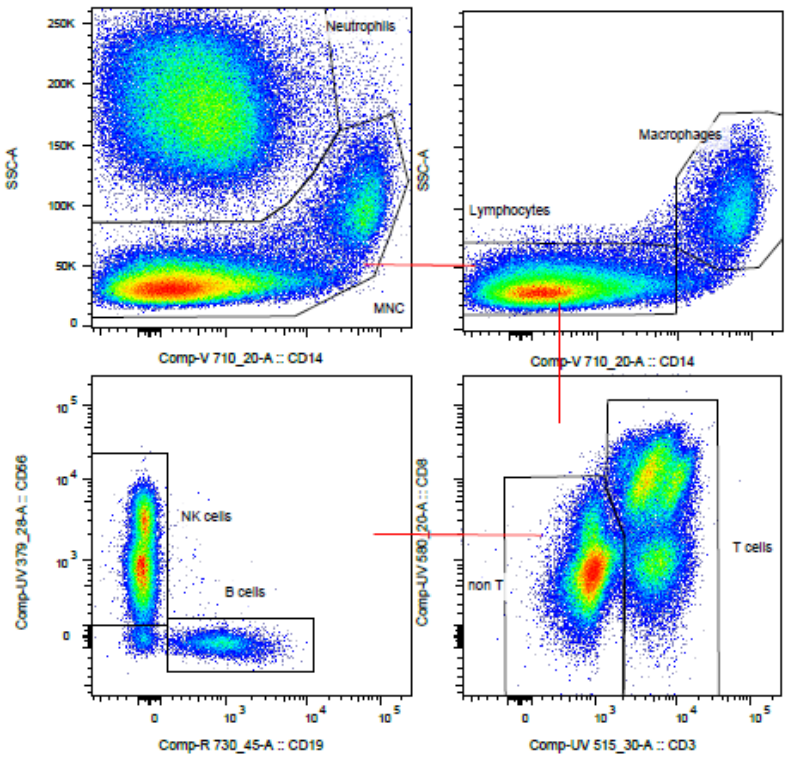

**Supplementary Figure 12. Gating strategy for the general immune phenotype panel analysed in liver biopsies [n=7 donor livers at time points pre NMP (T0) and at the end of NMP (T1)].** In initial cleaning steps dead cells, debris and doublets were removed using 7-AAD staining and scatter characteristics. Leukocytes were then defined by CD45 staining and sequentially gated into granulocytes (upper left), macrophages (upper right), T cells (lower right) and B and NK cells (lower left).

## Supplementary Figure 13

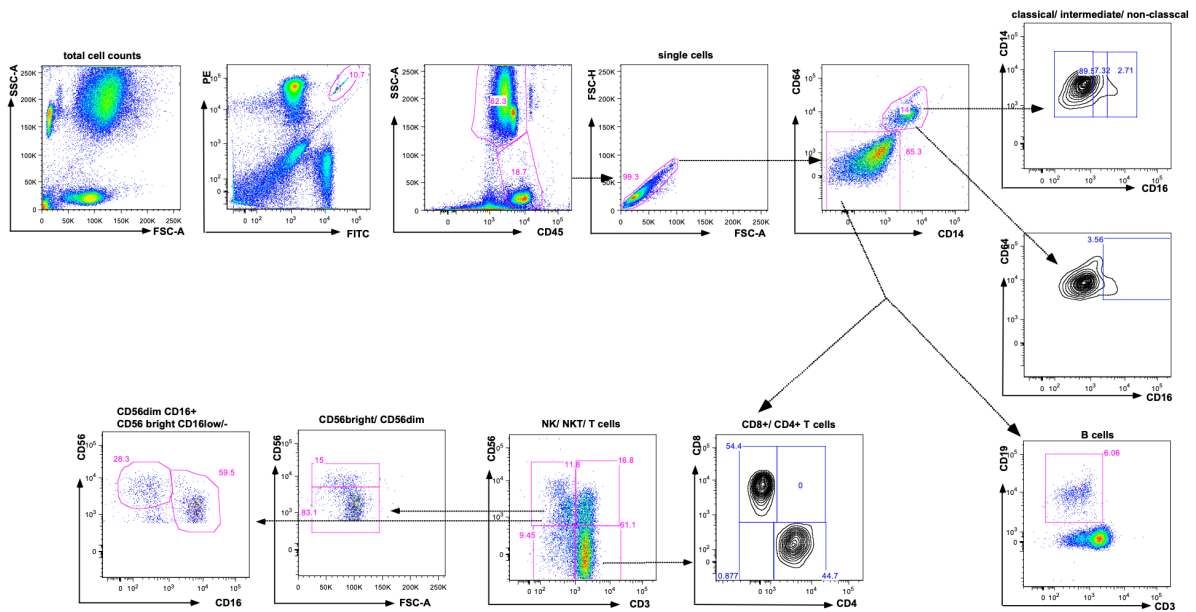

**Supplementary Figure 13. Gating strategy for the general immune phenotype panel analyzed in BD TruCount tubes (perfusate of n=26 donor livers subjected to NMP at various time points).** Gate for beads were set on an ungated dot plot (FITC vs. PE). Duplets were removed using a FSC-A vs. FSC-H dot plot. Gates for lymphocytes and granulocytes were set on a CD45 vs. SSC-A dot plot. Gating and exclusion of all CD14<sup>+</sup> monocytes were identified via CD14 versus CD64. The gated CD14<sup>+</sup> monocytes were used to further discriminate different inflammatory/differentiation stages of monocytes (CD16 versus CD14) resulting in CD14<sup>++</sup>CD16<sup>-</sup> classical monocytes, CD14<sup>++</sup>CD16<sup>+</sup> and CD14<sup>+</sup> CD16<sup>++</sup> monocytes, and CD16 vs CD64 to capture CD16<sup>+</sup> CD64<sup>+</sup> monocytes. Lymphocytes (CD14<sup>-</sup>CD64<sup>-</sup>) were gated on CD56<sup>+</sup> NK cells and NKT cells (CD56<sup>+</sup>CD3<sup>+</sup>). NK cells were further subdivided into CD56 dim and CD56 high NK cells. Lymphocytes were divided into CD3<sup>+</sup> T cells (CD56 vs. CD3) – gated T cells were used for identification of CD4<sup>+</sup> T-cells and CD8<sup>+</sup> T-cells (CD4 vs. CD8), and the gated lymphocytes were also used for identification of the B cell population (CD19 vs CD3). The total numbers of events for each of these subsets and the number of beads in the TruCount tubes were used to calculate the concentration of the different subsets.

## Supplementary Figure 14

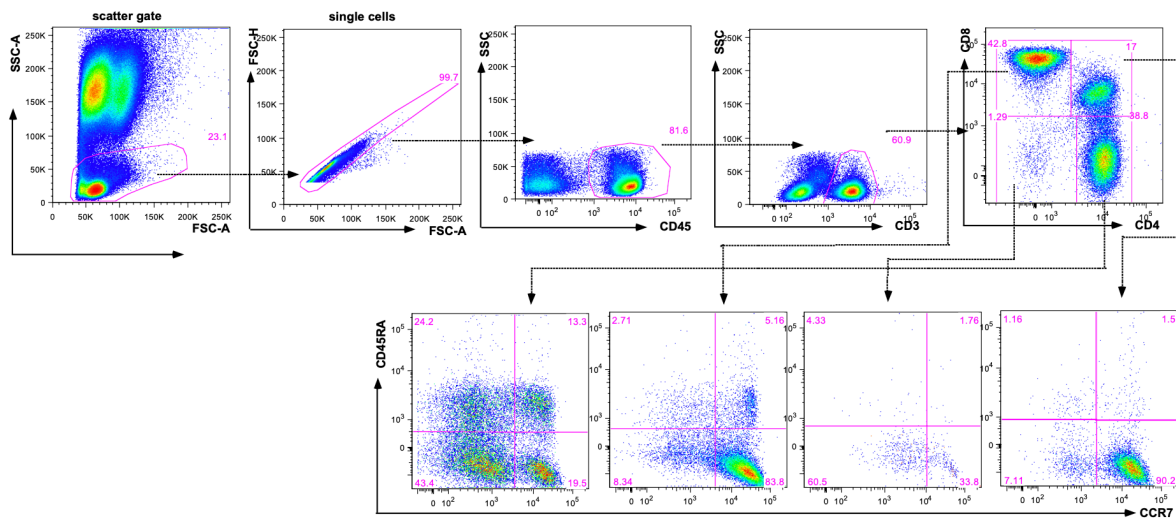

**Supplementary Figure 14. Gating strategy for the naive and memory subsets of T cells (perfusate of n=26 donor livers subjected to NMP at various time points).** Lymphocytes were gated in a FSC-a vs. SSC-A dot plot and duplets were removed using a FSC-A vs. FSC-H dot plot. CD45<sup>+</sup> cells and CD3<sup>+</sup> cells were gated versus SSC-A. CD3<sup>+</sup> T cells were subdivided into CD4<sup>+</sup> and CD8<sup>+</sup> T-cells, double negative and double positive T cells. (CD4 vs. CD8). Naive T cells (CD45RA<sup>+</sup>, CCR7<sup>+</sup>), central memory T cells (CD45RA<sup>-</sup>, CCR7<sup>+</sup>) and effector memory T cells (CD45RA<sup>-</sup>, CCR7<sup>-</sup>) and TEMRA (CD45RA<sup>+</sup>, CCR7<sup>-</sup>) cells were determined.

## Supplementary Figure 15

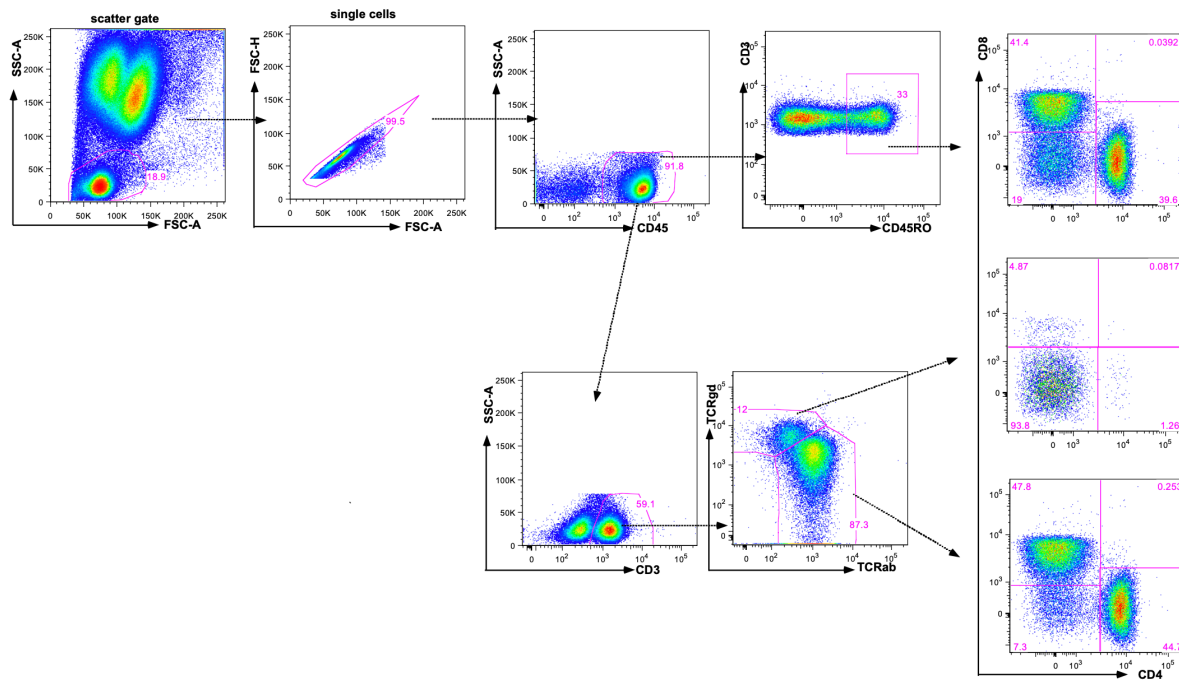

**Supplementary Figure 15. Gating strategy for T cells subtypes (perfusate of n=26 donor livers subjected to NMP at various time points).** Lymphocytes were gated in a FSC-a vs. SSC-A dot plot and duplets were removed using a FSC-A vs. FSC-H dot pot. CD45<sup>+</sup> cells were gated versus SSC-A. CD45<sup>+</sup> cells were analyzed for CD3<sup>+</sup> CD45RO expression and subdivided into CD4<sup>+</sup>, CD8<sup>+</sup>, double negative and double positive CD3<sup>+</sup> T cells. Additionally, CD45<sup>+</sup> cells were gated in CD3<sup>+</sup> T cells vs. SSC-A. CD3<sup>+</sup> T cells were subdivided into TCR αβ<sup>+</sup> and TCR γδ<sup>+</sup> T cells. These T cells subtypes were further divided into CD4<sup>+</sup>, CD8<sup>+</sup>, double negative and double positive T cells.

Supplementary Figure 16

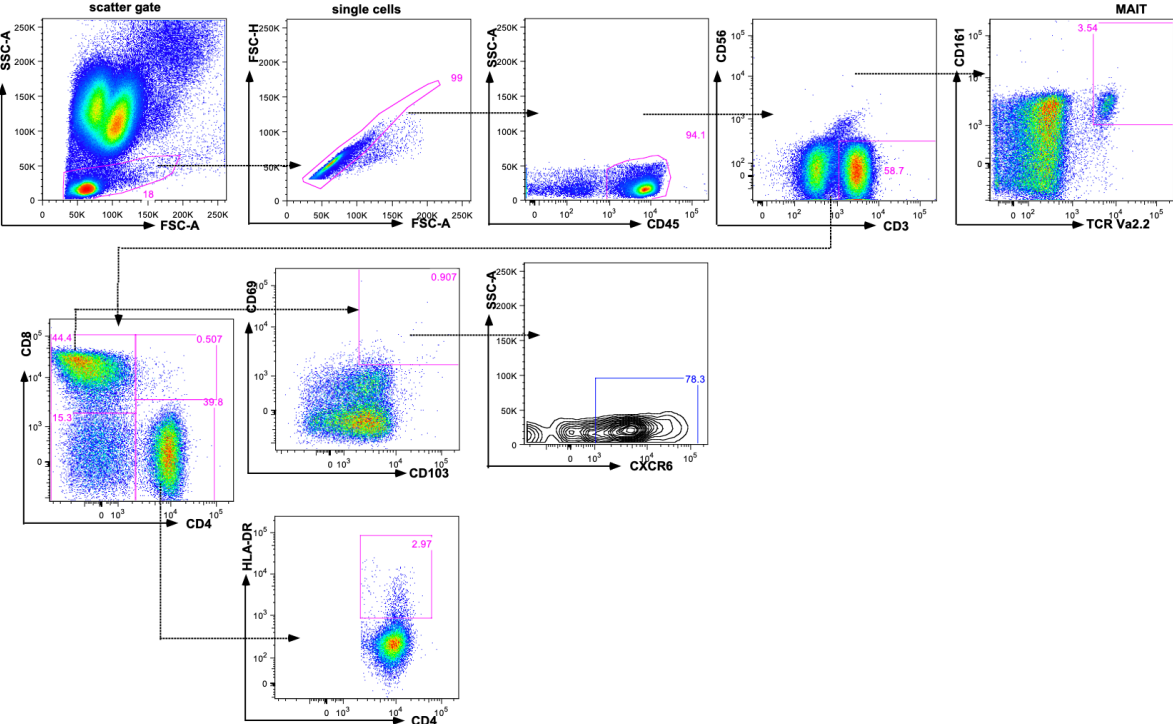

Supplementary Figure 16. Gating strategy for mucosa associated invariant T cells (MAIT) and resident liver T cells (perfusate of n=26 donor livers subjected to NMP at various time points). Lymphocytes were gated in a FSC-a vs. SSC-A dot plot and duplets were removed using a FSC-A vs. FSC-H dot pot. CD45<sup>+</sup> cells were gated versus SSC-A. T cells were gated vs CD56. TCR Va2.2<sup>+</sup> CD161<sup>+</sup> were defined as MAIT cells. CD3<sup>+</sup> T cells were subdivided into CD4<sup>+</sup> and CD8<sup>+</sup> T cells. Resident CD8<sup>+</sup> were defined as CD103<sup>+</sup> CD69<sup>+</sup> CXCR6<sup>+</sup> cells. Gates of CXCR6 were set according to their FMOs. Resident CD4<sup>+</sup> T cells were defined as HLA-DR<sup>+</sup> cells.

**Supplementary Figure 17**

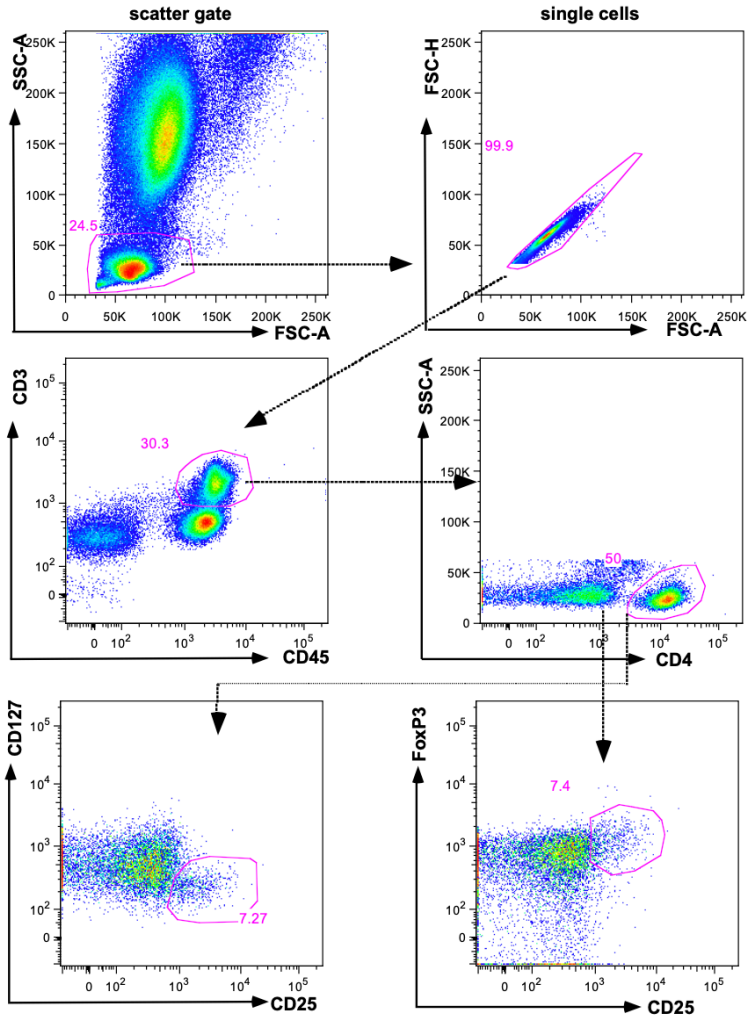

**Supplementary Figure 17. Gating strategy for regulatory T cells (perfusate of n=26 donor livers subjected to NMP at various time points).** Lymphocytes were gated in a FSC-a vs. SSC-A dot plot and duplets were removed using a FSC-A vs. FSC-H dot pot. CD3<sup>+</sup> cells were gated versus CD45<sup>+</sup> cells. CD3<sup>+</sup> T cells were subdivided into CD4<sup>+</sup> cells (CD4<sup>+</sup> vs. SSC-A). Regulatory T cells were determined as CD25<sup>+</sup> and FoxP3<sup>+</sup> CD127 dim cells.

**Supplementary Figure 18**

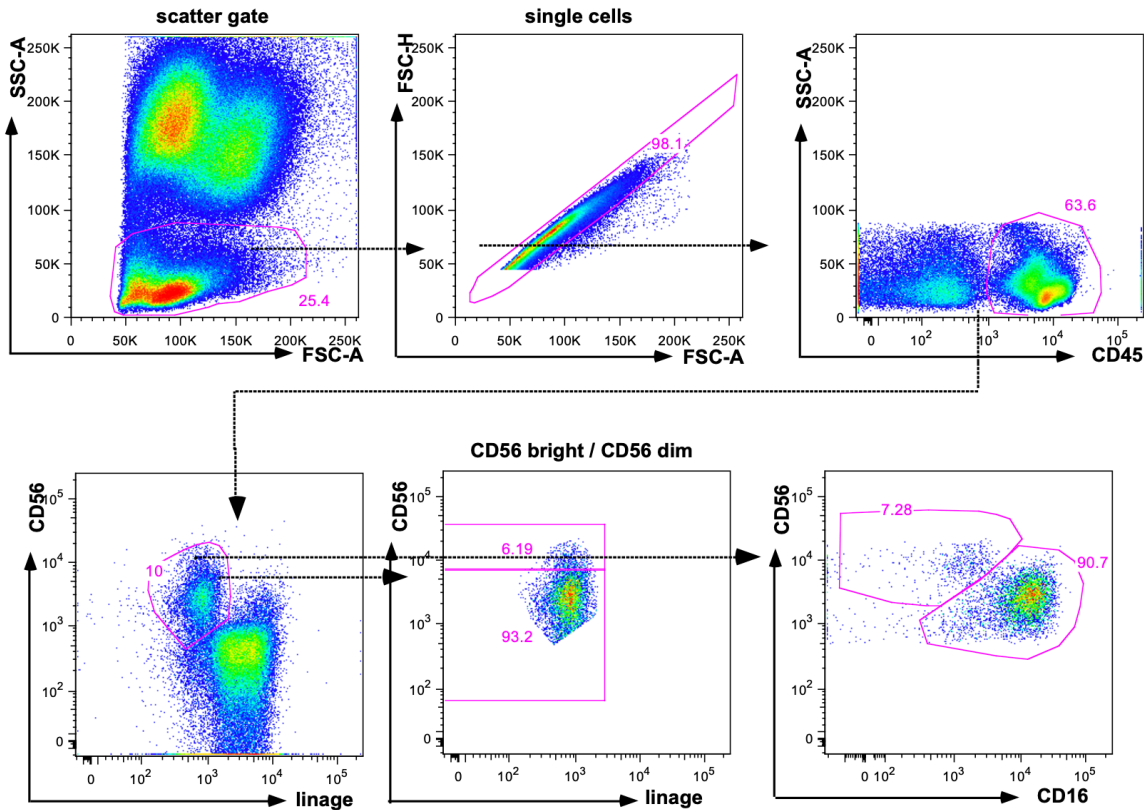

**Supplementary Figure 18. Gating strategy for natural killer (NK) cells (perfusate of n=26 donor livers subjected to NMP at various time points).** Lymphocytes were gated in a FSC-a vs. SSC-A dot plot and duplets were removed using a FSC-A vs. FSC-H dot pot. CD45<sup>+</sup> cells were gated versus SSC-A. CD45<sup>+</sup> cells were further discriminated into CD56<sup>+</sup> cells and lineage - cells (CD3, CD14, CD19). CD56<sup>+</sup> lineage- cells were subdivided into CD56 bright and CD56 dim cells and in CD56<sup>+</sup> CD16<sup>-</sup>/dim and CD56<sup>+</sup> CD16<sup>+</sup> cells.

## Supplementary Figure 19

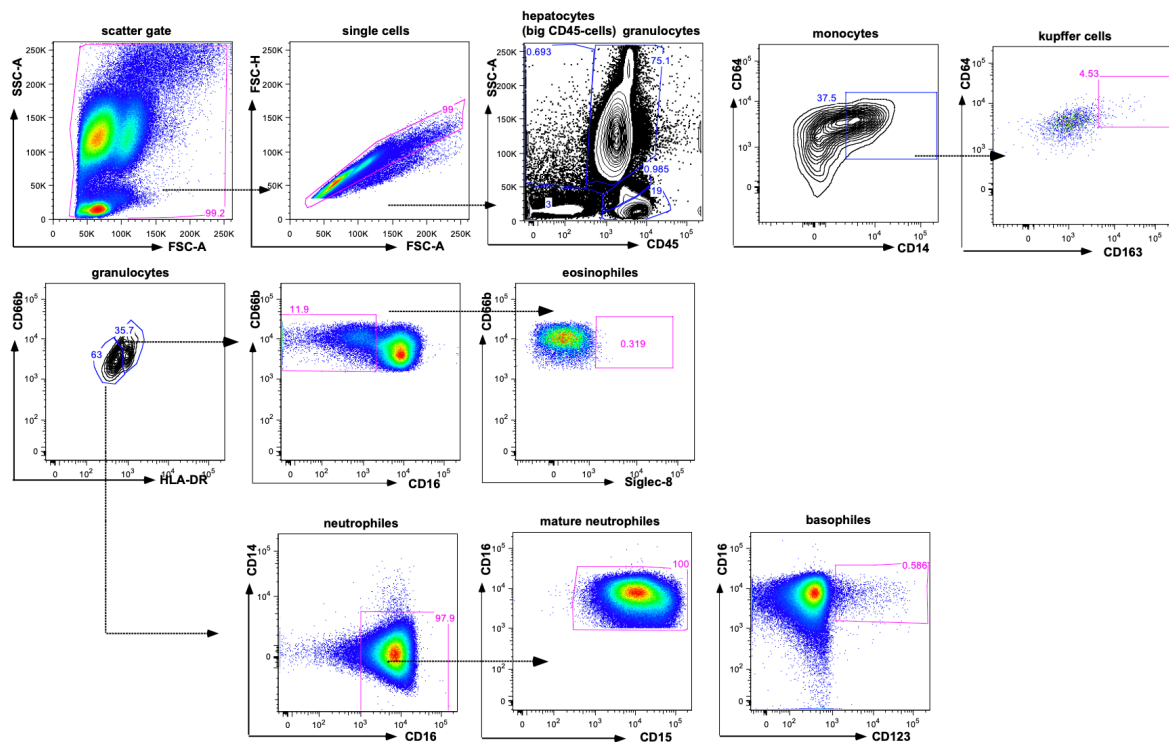

**Supplementary Figure 19. Gating strategy for granulocytes, hepatocytes and macrophages/Kupffer cells (perfusate of n=26 donor livers subjected to NMP at various time points).** Granulocytes, hepatocytes and macrophages/Kupffer cells were gated in a FSC-A vs. SSC-A dot plot and duplets were removed using a FSC-A vs. FSC-H dot plot. Hepatocytes were defined as big CD45<sup>+</sup> cells. Monocytes and macrophages were gated as CD14<sup>+</sup> CD64<sup>+</sup> cells. CD163<sup>+</sup> CD64<sup>+</sup> macrophages were subdivided from this population. Granulocytes were divided into HLA-DR low CD66b low and HLA-DR low and CD66b high cells. The latter were defined as eosinophils (Siglec 8<sup>+</sup> CD16<sup>-</sup>). HLA-DR low CD66b low cells were divided into neutrophils (CD16<sup>+</sup> CD15<sup>+</sup> CD14<sup>-</sup>) and basophils (CD123<sup>+</sup> CD16<sup>+</sup>).



## Supplementary Figure 20

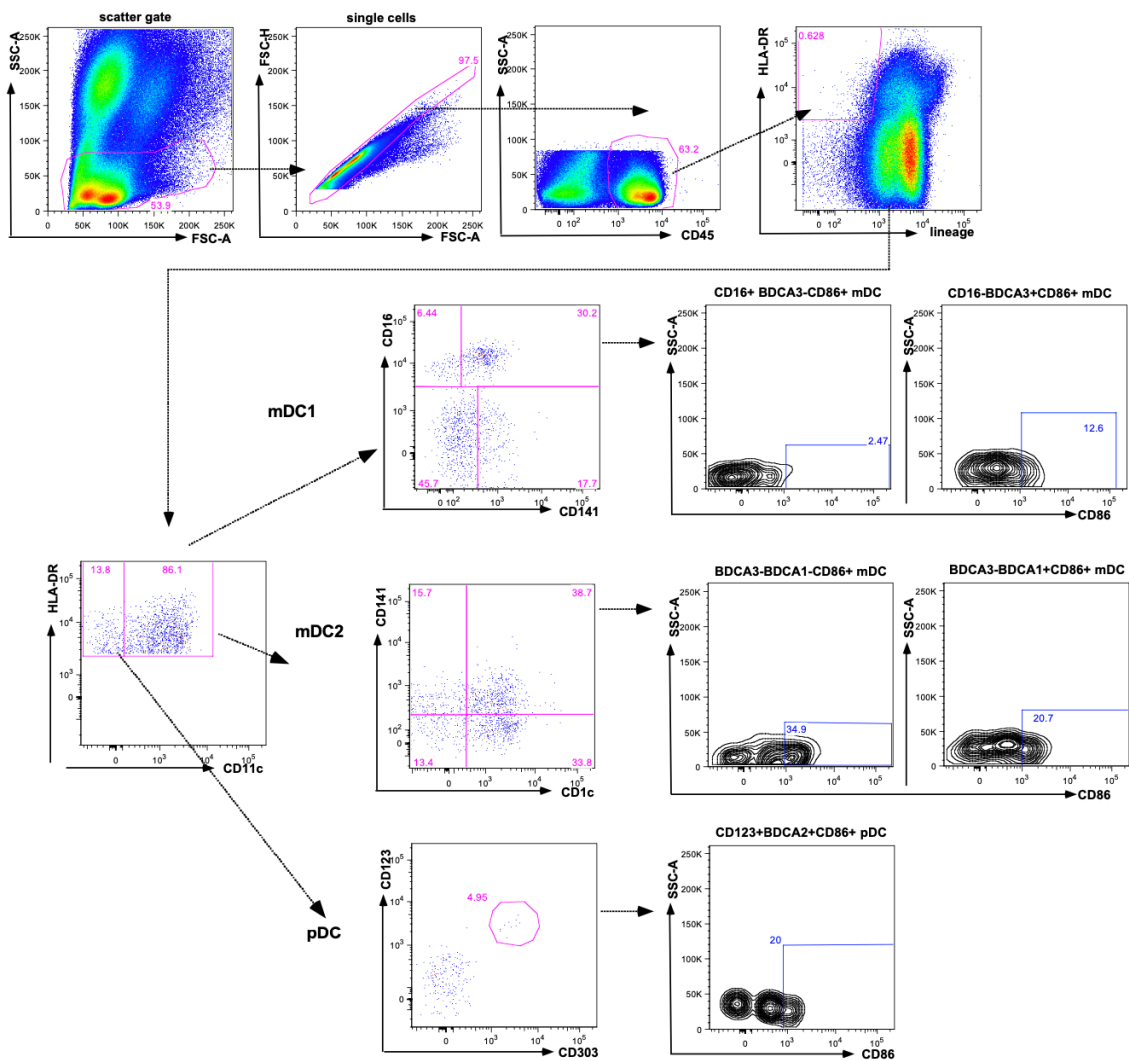

**Supplementary Figure 20. Gating strategy for dendritic cells (DCs) (perfusate of n=26 donor livers subjected to NMP at various time points).** Lymphocytes were gated in a FSC-a vs. SSC-A dot plot and duplets were removed using a FSC-A vs. FSC-H dot pot. CD45<sup>+</sup> cells were gated versus SSC-A. CD45<sup>+</sup> cells were further discriminated into HLA-DR<sup>+</sup> cells and lineage<sup>-</sup> cells (CD3, CD14, CD19, CD20). These cells were divided into HLA-DR<sup>+</sup> CD11c<sup>-</sup> cells and HLA-DR<sup>+</sup> CD11c<sup>+</sup> cells. HLA-DR<sup>+</sup> CD11c<sup>-</sup> cells were determined as plasmacytoid DCs (pDC) via CD303 and CD123. Activity of pDCs was analyzed with CD86. HLA-DR<sup>+</sup> CD11c<sup>+</sup> DCs were subdivided into myeloid DC1 (mDC1) via CD141 and CD16 and myeloid DC2 (mDC2) via CD1c and CD141. Activity of subtypes of DCs was determined with CD86. Gates of CD86 were set according to their FMOs.

## Supplementary Tables

**Supplementary Table 1. Individual donor and preservation data of the study population (n=34)**

| n  | LT  | Donor age (y) | Cause of death | Donor type | ECD | Liver DRI | Days ICU donor | Indication for NMP (R/D/L) | CIT > 6h | Total PT (h) |
|----|-----|---------------|----------------|------------|-----|-----------|----------------|----------------------------|----------|--------------|
| 1  | Yes | 48            | CVA            | DBD        | No  | 1.82      | 2              | 1/1/1                      | Yes      | 38.02        |
| 2  | Yes | 56            | Trauma         | DBD        | No  | 1.31      | 1              | 0/1/1                      | No       | 14.28        |
| 3  | No  | 66            | CVA            | DBD        | Yes | 2.25      | 1              | 0/1/0                      | Yes      | 30.42        |
| 4  | Yes | 74            | Circulatory    | DBD        | Yes | 1.90      | 6              | 0/1/1                      | Yes      | 25.67        |
| 5  | Yes | 53            | Circulatory    | DBD        | Yes | 1.88      | 1              | 1/1/1                      | No       | 10.95        |
| 6  | Yes | 49            | CVA            | DBD        | Yes | 1.61      | 2              | 0/1/1                      | Yes      | 15.63        |
| 7  | Yes | 65            | CVA            | DBD        | Yes | 1.77      | 15             | 0/1/1                      | No       | 17.52        |
| 8  | Yes | 76            | CVA            | DBD        | Yes | 2.02      | 5              | 0/1/0                      | Yes      | 19.22        |
| 9  | Yes | 55            | CVA            | DBD        | No  | 1.53      | 3              | 1/1/0                      | No       | 25.98        |
| 10 | No  | 31            | Circulatory    | DCD        | Yes | 1.77      | 1              | 0/1/0                      | No       | 26.67        |
| 11 | Yes | 66            | Trauma         | DBD        | Yes | 1.28      | 1              | 0/0/1                      | Yes      | 17.03        |
| 12 | Yes | 73            | CVA            | DBD        | Yes | 1.85      | 1              | 0/1/1                      | Yes      | 27.38        |
| 13 | No  | 15            | Hypoxia        | DBD        | Yes | 1.20      | 3              | 0/1/0                      | No       | 23.40        |
| 14 | Yes | 56            | CVA            | DCD        | Yes | 3.71      | 1              | 0/1/0                      | Yes      | 30.65        |
| 15 | No  | 53            | Trauma         | DCD        | Yes | 2.22      | 1              | 0/1/0                      | Yes      | 27.65        |
| 16 | No  | 59            | CVA            | DCD        | Yes | 2.42      | 8              | 0/1/0                      | Yes      | 27.55        |
| 17 | Yes | 66            | CVA            | DBD        | Yes | 1.76      | 6              | 0/1/1                      | No       | 16.18        |
| 18 | Yes | 28            | Trauma         | DBD        | No  | 0.90      | 6              | 1/1/0                      | No       | 26.15        |
| 19 | No  | 48            | Trauma         | DCD        | Yes | 2.23      | 4              | 0/1/0                      | Yes      | 29.27        |
| 20 | Yes | 85            | CVA            | DBD        | Yes | 1.91      | 2              | 0/1/0                      | No       | 27.00        |
| 21 | Yes | 68            | Trauma         | DCD        | Yes | 1.53      | 7              | 1/1/1                      | No       | 8.52         |
| 22 | Yes | 62            | CVA            | DBD        | Yes | 1.76      | 2              | 0/1/0                      | No       | 33.57        |
| 23 | Yes | 65            | Circulatory    | DCD        | Yes | 2.67      | 4              | 0/1/0                      | Yes      | 29.83        |
| 24 | No  | 79            | CVA            | DBD        | Yes | 2.09      | 5              | 0/1/0                      | Yes      | 115.25       |
| 25 | No  | 52            | CVA            | DCD        | Yes | 3.66      | 9              | 0/1/0                      | Yes      | 22.28        |
| 26 | Yes | 75            | Trauma         | DBD        | Yes | 1.65      | 1              | 1/1/0                      | Yes      | 18.03        |
| 27 | Yes | 70            | CVA            | DBD        | Yes | 1.86      | 4              | 0/1/1                      | No       | 16.12        |
| 28 | Yes | 70            | Circulatory    | DBD        | Yes | 1.94      | 4              | 0/1/1                      | No       | 18.22        |
| 29 | Yes | 21            | Circulatory    | DBD        | No  | 1.59      | 3              | 0/1/1                      | No       | 25.23        |
| 30 | Yes | 50            | CVA            | DBD        | No  | 1.38      | 1              | 0/1/1                      | No       | 26.95        |
| 31 | No  | 62            | CVA            | DBD        | Yes | 2.06      | 2              | 0/1/0                      | Yes      | 30.00        |
| 32 | Yes | 72            | Trauma         | DCD        | Yes | 1.62      | 4              | 0/1/1                      | No       | 21.10        |
| 33 | Yes | 84            | CVA            | DBD        | Yes | 2.02      | 2              | 0/1/0                      | No       | 23.83        |
| 34 | No  | 54            | CVA            | DBD        | Yes | 2.47      | 2              | 0/1/0                      | Yes      | 20.00        |

Abbreviations: LT: liver transplantation, NMP: normothermic machine perfusion, y: years, CVA: cerebrovascular accident, ECD: extended criteria donor, DRI: Donor Risk Index, Indication for NMP (R: recipient, D: donor, L: logistic), CIT: cold ischemia time, PT: preservation time, h: hours

**Supplementary Table 2. Total cell counts assessed with flow cytometry in perfusate samples at various time points during NMP (n=26 donor livers subjected to NMP).**

| <b>Cell population</b> | <b>1 h</b><br>Count/ $\mu$ l<br>average<br>value<br>[95% CI] | <b>4 h</b><br>Count/ $\mu$ l<br>average<br>value<br>[95% CI] | <b>6 h</b><br>Count/ $\mu$ l<br>average<br>value<br>[95% CI] | <b>12 h</b><br>Count/ $\mu$ l<br>average<br>value<br>[95% CI] | <b>24 h</b><br>Count/ $\mu$ l<br>average<br>value<br>[95% CI] | <b>p-value</b> |
|------------------------|--------------------------------------------------------------|--------------------------------------------------------------|--------------------------------------------------------------|---------------------------------------------------------------|---------------------------------------------------------------|----------------|
| <b>Leucocytes</b>      | 2537<br>[2003, 3215]                                         | 2491<br>[1970, 3149]                                         | 2514<br>[1986, 3181]                                         | 2061<br>[1611, 2635]                                          | 1529<br>[1180, 1982]                                          | <0.001         |
| <b>Lymphocytes</b>     | 450<br>[346, 585]                                            | 385<br>[297, 498]                                            | 402<br>[309, 521]                                            | 324<br>[246, 426]                                             | 234<br>[174, 313]                                             | <0.001         |
| <b>T cells</b>         | 203<br>[157, 263]                                            | 151<br>[117, 195]                                            | 144<br>[112, 187]                                            | 118<br>[90, 155]                                              | 92<br>[69, 122]                                               | <0.001         |
| <b>CD4+ T cells</b>    | 93<br>[73, 120]                                              | 79<br>[61, 101]                                              | 77<br>[60, 99]                                               | 63<br>[48, 82]                                                | 44<br>[33, 59]                                                | <0.001         |
| <b>CD8+ T cells</b>    | 79<br>[53, 117]                                              | 50<br>[33, 74]                                               | 47<br>[31, 70]                                               | 40<br>[26, 60]                                                | 31<br>[20, 48]                                                | <0.001         |
| <b>B cells</b>         | 52<br>[38, 71]                                               | 52<br>[38, 71]                                               | 60<br>[44, 82]                                               | 53<br>[38, 73]                                                | 35<br>[24, 49]                                                | 0.002          |
| <b>NK cells</b>        | 99<br>[68, 143]                                              | 88<br>[61, 127]                                              | 96<br>[66, 138]                                              | 75<br>[51, 111]                                               | 51<br>[34, 78]                                                | 0.009          |
| <b>NKT cells</b>       | 26<br>[17, 38]                                               | 19<br>[13, 29]                                               | 19<br>[13, 28]                                               | 16<br>[10, 24]                                                | 12<br>[7, 18]                                                 | 0.003          |
| <b>Monocytes</b>       | 37<br>[26, 54]                                               | 52<br>[36, 76]                                               | 64<br>[44, 93]                                               | 39<br>[27, 58]                                                | 30<br>[20, 46]                                                | <0.001         |
| <b>Granulocytes</b>    | 1947<br>[1510, 2511]                                         | 1988<br>[1544, 2559]                                         | 1972<br>[1530, 2540]                                         | 1643<br>[1262, 2139]                                          | 1219<br>[924, 1607]                                           | <0.001         |

Data are shown as average values and 95% confidence intervals (in brackets), estimated by linear mixed effect model for repeated measures. The p-values refer to the change over time and were assessed using ANOVA.

**Supplementary Table 3. Cell frequencies assessed with flow cytometry in perfusate samples at various time points during NMP (n=26 donor livers subjected to NMP).**

| Cell population           | 1 h<br>% (average<br>value [95%<br>CI]) | 4 h<br>% (average<br>value [95%<br>CI]) | 6 h<br>% (average<br>value [95%<br>CI]) | 12 h<br>% (average<br>value [95%<br>CI]) | 24 h<br>% (average<br>value [95%<br>CI]) | p-value |
|---------------------------|-----------------------------------------|-----------------------------------------|-----------------------------------------|------------------------------------------|------------------------------------------|---------|
| <b>T cells</b>            | 47<br>[41, 52]                          | 42<br>[37, 48]                          | 39<br>[33, 44]                          | 39<br>[33, 45]                           | 42<br>[36, 48]                           | 0.007   |
| <b>CD4+ T cells</b>       | 48<br>[42, 54]                          | 55<br>[49, 61]                          | 55<br>[49, 61]                          | 55<br>[49, 62]                           | 52<br>[45, 58]                           | <0.001  |
| <b>CD8+ T cells</b>       | 44<br>[37, 50]                          | 38<br>[31, 44]                          | 37<br>[31, 44]                          | 38<br>[31, 45]                           | 41<br>[33, 48]                           | <0.001  |
| <b>Foxp3+ T cells</b>     | 2.3<br>[1.6, 3.3]                       | 2.5<br>[1.7, 3.5]                       | 2.8<br>[1.9, 3.9]                       | 3.7<br>[2.6, 5.2]                        | 4.7<br>[3.3, 6.6]                        | <0.001  |
| <b>γδ T cells</b>         | 2.7<br>[1.4, 4.7]                       | 2.3<br>[1.1, 4.0]                       | 2.2<br>[1.1, 3.9]                       | 2.5<br>[1.3, 4.3]                        | 2.4<br>[1.2, 4.3]                        | 0.749   |
| <b>DN T cells</b>         | 6.6<br>[4.7, 9.2]                       | 6.3<br>[4.5, 8.8]                       | 6.3<br>[4.5, 8.8]                       | 6.8<br>[4.8, 9.5]                        | 7.9<br>[5.5, 11.3]                       | 0.518   |
| <b>MAIT cells</b>         | 1.4<br>[1.1, 1.7]                       | 1.4<br>[1.1, 1.7]                       | 1.4<br>[1.1, 1.7]                       | 1.5<br>[1.1, 1.8]                        | 1.4<br>[1.1, 1.8]                        | 0.997   |
| <b>Dendritic cells</b>    | 0.86<br>[0.53, 1.27]                    | 0.67<br>[0.36, 1.04]                    | 0.62<br>[0.33, 0.98]                    | 0.83<br>[0.48, 1.27]                     | 0.83<br>[0.43, 1.35]                     | 0.530   |
| <b>B cells</b>            | 13<br>[10, 16]                          | 15<br>[12, 18]                          | 17<br>[14, 20]                          | 19<br>[16, 22]                           | 16<br>[13, 20]                           | 0.001   |
| <b>NK cells</b>           | 22<br>[18, 27]                          | 23<br>[19, 28]                          | 24<br>[19, 29]                          | 23<br>[19, 29]                           | 22<br>[17, 28]                           | 0.887   |
| <b>NKT cells</b>          | 7.5<br>[5.8, 9.2]                       | 6.4<br>[4.7, 8.1]                       | 5.9<br>[4.2, 7.7]                       | 6.3<br>[4.5, 8.1]                        | 6.0<br>[4.2, 7.9]                        | 0.103   |
| <b>Monocytes</b>          | 7<br>[5, 10]                            | 11<br>[8, 15]                           | 13<br>[9, 17]                           | 10<br>[7, 14]                            | 10<br>[7, 15]                            | 0.001   |
| <b>Granulocytes</b>       | 60<br>[54, 65]                          | 62<br>[57, 68]                          | 62<br>[57, 68]                          | 61<br>[56, 67]                           | 58<br>[52, 63]                           | 0.122   |
| <b>Kupffer cells</b>      | 5.6<br>[3.4, 8.8]                       | 4.0<br>[2.4, 6.4]                       | 4.0<br>[2.4, 6.5]                       | 6.7<br>[4.1, 10.7]                       | 11.9<br>[7.1, 19.5]                      | 0.099   |
| <b>Hepatocytes</b>        | 0.86<br>[0.64, 1.10]                    | 0.80<br>[0.60, 1.03]                    | 0.95<br>[0.72, 1.20]                    | 0.67<br>[0.46, 0.90]                     | 1.10<br>[0.80, 1.45]                     | 0.001   |
| <b>CD4+ cmT cells</b>     | 15.98<br>[11.25, 20.72]                 | 18.88<br>[14.15, 23.60]                 | 20.17<br>[15.44, 24.90]                 | 19.36<br>[14.59, 24.13]                  | 15.60<br>[10.70, 20.50]                  | <0.001  |
| <b>CD4+ emT cells</b>     | 38.90<br>[32.73, 46.21]                 | 31.57<br>[26.57, 37.47]                 | 31.12<br>[26.17, 36.96]                 | 27.49<br>[22.94, 32.89]                  | 28.22<br>[23.11, 34.40]                  | <0.001  |
| <b>CD4+ TEMRA T cells</b> | 18.52<br>[12.07, 28.17]                 | 12.77<br>[8.23, 19.53]                  | 10.61<br>[6.78, 16.33]                  | 10.50<br>[6.65, 16.30]                   | 12.12<br>[7.53, 19.20]                   | <0.001  |
| <b>CD8+ em T cells</b>    | 4.12<br>[2.60, 6.27]                    | 5.26<br>[3.42, 7.86]                    | 5.87<br>[3.84, 8.75]                    | 5.30<br>[3.39, 8.04]                     | 4.31<br>[2.58, 6.87]                     | 0.141   |
| <b>CD8+ em T cells</b>    | 49.81<br>[40.01, 59.61]                 | 48.18<br>[38.42, 57.94]                 | 47.75<br>[37.97, 57.53]                 | 45.88<br>[35.91, 55.85]                  | 48.43<br>[37.90, 58.96]                  | 0.746   |
| <b>CD8+ TEMRA T cells</b> | 31.34<br>[23.62, 41.47]                 | 24.74<br>[18.64, 32.74]                 | 25.70<br>[19.36, 34.03]                 | 23.95<br>[17.87, 32.01]                  | 22.35<br>[16.24, 30.63]                  | 0.024   |

|                                        |                      |                      |                      |                      |                      |        |
|----------------------------------------|----------------------|----------------------|----------------------|----------------------|----------------------|--------|
| <b>CD4+CD28-T cells</b>                | 47<br>[34, 60]       | 51<br>[38, 64]       | 51<br>[38, 64]       | 53<br>[40, 66]       | 54<br>[41, 67]       | 0.096  |
| <b>CD8+CD28-T cells</b>                | 72<br>[65, 80]       | 74<br>[66, 81]       | 74<br>[66, 81]       | 74<br>[66, 81]       | 74<br>[66, 82]       | 0.946  |
| <b>Myeloid DC 1</b>                    | 55.01 [44.79, 65.23] | 58.25 [48.12, 68.38] | 57.85 [47.47, 68.22] | 56.58 [45.88, 67.28] | 48.88 [37.08, 60.69] | 0.461  |
| <b>Activated mDC1</b>                  | 18.15 [10.36, 31.28] | 10.66 [5.91, 18.65]  | 9.64 [5.29, 16.99]   | 7.51 [3.99, 13.51]   | 5.24 [2.57, 9.89]    | <0.001 |
| <b>Myeloid DC 2</b>                    | 8.80 [5.31, 14.22]   | 16.18 [10.11, 25.57] | 14.01 [8.69, 22.25]  | 17.96 [10.93, 29.15] | 18.62 [10.83, 31.56] | 0.011  |
| <b>Activated mDC2</b>                  | 39.27 [26.82, 51.73] | 46.05 [33.62, 58.48] | 44.77 [32.33, 57.21] | 51.80 [39.19, 64.41] | 50.13 [37.22, 63.04] | <0.001 |
| <b>Plasmacytoid DC</b>                 | 28.45 [16.49, 40.40] | 30.39 [18.44, 42.34] | 26.58 [13.78, 39.37] | 28.83 [14.03, 43.62] | 12.62 [4.53, 29.78]  | 0.367  |
| <b>Activated pDC</b>                   | 1.85 [0.58, 4.12]    | 1.03 [0.13, 2.65]    | 0.58 [0.15, 1.94]    | 0.72 [0.14, 2.43]    | 0.94 [0.11, 3.23]    | 0.283  |
| <b>CD56+ dim CD16+ NK cells</b>        | 94.21 [96.11, 91.58] | 94.46 [96.28, 91.93] | 95.16 [96.79, 92.90] | 94.33 [96.25, 91.65] | 93.51 [95.74, 90.34] | 0.466  |
| <b>CD56+ bright CD16- NK cells</b>     | 2.46 [1.66, 3.50]    | 2.30 [1.55, 3.29]    | 1.96 [1.28, 2.84]    | 1.85 [1.17, 2.75]    | 2.21 [1.41, 3.28]    | 0.396  |
| <b>CD56+ bright CD16+ dim NK cells</b> | 3.43 [2.37, 4.82]    | 3.13 [2.15, 4.42]    | 2.49 [1.66, 3.58]    | 2.60 [1.72, 3.76]    | 2.85 [1.88, 4.15]    | 0.067  |
| <b>Classical monocytes</b>             | 64.29 [56.56, 72.01] | 59.67 [52.03, 67.32] | 55.11 [47.43, 62.78] | 55.78 [47.68, 63.88] | 46.97 [38.36, 55.57] | <0.001 |
| <b>Intermediate monocytes</b>          | 27.67 [20.04, 35.30] | 31.33 [23.76, 38.89] | 33.62 [26.03, 41.21] | 33.93 [25.97, 41.88] | 40.00 [31.60, 48.40] | 0.021  |
| <b>Non classical monocytes</b>         | 5.57 [3.66, 8.26]    | 5.72 [3.78, 8.44]    | 7.39 [4.97, 10.80]   | 6.21 [4.04, 9.32]    | 7.85 [5.05, 11.95]   | 0.276  |
| <b>Neutrophils</b>                     | 93.46 [96.30, 88.90] | 94.08 [96.68, 89.92] | 94.39 [96.88, 90.41] | 93.43 [96.31, 88.78] | 92.59 [95.87, 87.22] | 0.379  |
| <b>Basophils</b>                       | 0.23 [0.13, 0.34]    | 0.25 [0.15, 0.37]    | 0.28 [0.17, 0.39]    | 0.26 [0.15, 0.38]    | 0.28 [0.17, 0.40]    | 0.730  |
| <b>Eosinophils</b>                     | 0.38 [0.20, 0.59]    | 0.32 [0.15, 0.51]    | 0.32 [0.15, 0.52]    | 0.29 [0.11, 0.49]    | 0.29 [0.10, 0.51]    | 0.756  |

Data are shown as average values and 95% confidence intervals (in brackets), estimated by linear mixed effect model for repeated measures. The p-values refer to the change over time and were assessed using ANOVA.

**Supplementary Table 4. Cytokine levels assessed in perfusate samples at various time points during NMP (n=26 donor livers subjected to NMP).**

| <b>Cytokine</b>     | <b>1 h<br/>(pg/ml)<br/>average<br/>value [95%<br/>CI]</b> | <b>4 h<br/>(pg/ml)<br/>average<br/>value<br/>[95% CI]</b> | <b>6 h<br/>(pg/ml)<br/>average<br/>value<br/>[95% CI]</b> | <b>12 h<br/>(pg/ml)<br/>average<br/>value<br/>[95% CI]</b> | <b>24 h<br/>(pg/ml)<br/>average<br/>value<br/>[95% CI]</b> | <b>p-value</b> |
|---------------------|-----------------------------------------------------------|-----------------------------------------------------------|-----------------------------------------------------------|------------------------------------------------------------|------------------------------------------------------------|----------------|
| <b>Interleukins</b> |                                                           |                                                           |                                                           |                                                            |                                                            |                |
| <b>IL-1a</b>        | 2<br>[1, 4]                                               | 7<br>[4, 11]                                              | 5<br>[3, 9]                                               | 10<br>[6, 18]                                              | 17<br>[10, 29]                                             | <0.001         |
| <b>IL-1b</b>        | 8<br>[5, 12]                                              | 13<br>[8, 20]                                             | 13<br>[8, 20]                                             | 15<br>[9, 26]                                              | 15<br>[9, 25]                                              | 0.047          |
| <b>IL-2</b>         | 4<br>[2, 7]                                               | 9<br>[5, 14]                                              | 9<br>[5, 14]                                              | 14<br>[8, 24]                                              | 19<br>[11, 33]                                             | <0.001         |
| <b>IL-4</b>         | 11<br>[7, 17]                                             | 38<br>[26, 56]                                            | 28<br>[19, 41]                                            | 40<br>[25, 64]                                             | 59<br>[38, 91]                                             | <0.001         |
| <b>IL-5</b>         | 6<br>[3, 12]                                              | 4<br>[2, 9]                                               | 2<br>[1, 5]                                               | 2<br>[0, 4]                                                | 3<br>[1, 7]                                                | 0.054          |
| <b>IL-6</b>         | 689<br>[286, 1658]                                        | 866<br>[346, 2162]                                        | 400<br>[159, 1004]                                        | 706<br>[228, 2181]                                         | 1551<br>[537, 4473]                                        | 0.331          |
| <b>IL-7</b>         | 4<br>[3, 6]                                               | 8<br>[6, 10]                                              | 8<br>[6, 10]                                              | 24<br>[18, 31]                                             | 40<br>[31, 51]                                             | <0.001         |
| <b>IL-9</b>         | 13<br>[6, 19]                                             | 41<br>[34, 47]                                            | 31<br>[25, 38]                                            | 56<br>[47, 64]                                             | 62<br>[54, 70]                                             | <0.001         |
| <b>IL-10</b>        | 734<br>[407, 1322]                                        | 835<br>[457, 1528]                                        | 344<br>[179, 660]                                         | 261<br>[131, 516]                                          | 219<br>[113, 423]                                          | <0.001         |
| <b>IL12p70</b>      | 2.7<br>[2.2, 3.2]                                         | 3.3<br>[2.8, 3.9]                                         | 3.9<br>[3.3, 4.6]                                         | 2.0<br>[1.5, 2.6]                                          | 2.2<br>[1.8, 2.8]                                          | <0.001         |
| <b>IL-13</b>        | 7<br>[6, 9]                                               | 8<br>[6, 10]                                              | 6<br>[5, 8]                                               | 13<br>[10, 18]                                             | 15<br>[11, 20]                                             | <0.001         |
| <b>IL-15</b>        | 0.85<br>[0.45, 1.35]                                      | 0.53<br>[0.21, 0.95]                                      | 0.26<br>[0.02, 0.60]                                      | 0.22<br>[0.09, 0.63]                                       | 0.08<br>[0.18, 0.43]                                       | <0.001         |
| <b>IL-17a</b>       | 2.1<br>[1.2, 3.4]                                         | 2.6<br>[1.6, 4.2]                                         | 2.2<br>[1.3, 3.6]                                         | 5.5<br>[3.3, 8.7]                                          | 6.5<br>[4.1, 10.1]                                         | <0.001         |
| <b>IL-18</b>        | 418<br>[298, 585]                                         | 550<br>[394, 769]                                         | 495<br>[353, 694]                                         | 673<br>[468, 967]                                          | 735<br>[515, 1050]                                         | <0.001         |
| <b>IL-21</b>        | 7<br>[2, 17]                                              | 4<br>[1, 10]                                              | 2<br>[0, 5]                                               | 4<br>[1, 11]                                               | 4<br>[1, 12]                                               | <0.001         |
| <b>IL-22</b>        | 12<br>[5, 28]                                             | 19<br>[8, 45]                                             | 14<br>[5, 32]                                             | 8<br>[2, 21]                                               | 16<br>[6, 40]                                              | 0.293          |
| <b>IL-23</b>        | 0.5<br>[0.1, 1.0]                                         | 0.9<br>[0.4, 1.6]                                         | 1.6<br>[0.9, 2.5]                                         | 0.1<br>[0.3, 0.6]                                          | 0.3<br>[0.1, 0.8]                                          | <.001          |
| <b>IL-27</b>        | 4<br>[2, 7]                                               | 12<br>[7, 21]                                             | 13<br>[7, 22]                                             | 32<br>[17, 61]                                             | 35<br>[19, 63]                                             | <0.001         |
| <b>IL-31</b>        | 0.55<br>[0.27, 0.90]                                      | 0.12<br>[0.08, 0.36]                                      | 0.03<br>[0.16, 0.26]                                      | 0.01<br>[0.24, 0.27]                                       | 0.08<br>[0.15, 0.37]                                       | 0.009          |
| <b>Chemokines</b>   |                                                           |                                                           |                                                           |                                                            |                                                            |                |
| <b>Eotaxin</b>      | 30<br>[20, 46]                                            | 27<br>[18, 41]                                            | 23<br>[15, 35]                                            | 82<br>[49, 136]                                            | 145<br>[89, 234]                                           | <0.001         |

|                                   |                      |                      |                      |                      |                      |        |
|-----------------------------------|----------------------|----------------------|----------------------|----------------------|----------------------|--------|
| <b>GROa</b>                       | 18<br>[10, 30]       | 173<br>[105, 285]    | 94<br>[55, 159]      | 239<br>[130, 440]    | 517<br>[290, 921]    | <0.001 |
| <b>IL-8</b>                       | 256<br>[167, 392]    | 2065<br>[1270, 3358] | 1372<br>[675, 2785]  | 4453<br>[2478, 7999] | 4958<br>[2921, 8414] | <0.001 |
| <b>IP-10</b>                      | 124<br>[82, 187]     | 227<br>[151, 340]    | 174<br>[114, 265]    | 628<br>[379, 1040]   | 990<br>[613, 1599]   | <0.001 |
| <b>MCP-1</b>                      | 1553<br>[1169, 2063] | 2954<br>[2164, 4033] | 1808<br>[1195, 2734] | 6083<br>[4197, 8816] | 4641<br>[3328, 6473] | <0.001 |
| <b>MIP-1a</b>                     | 65<br>[49, 87]       | 44<br>[33, 59]       | 34<br>[25, 46]       | 89<br>[62, 127]      | 183<br>[130, 256]    | <0.001 |
| <b>MIP-1b</b>                     | 271<br>[206, 355]    | 351<br>[268, 458]    | 278<br>[211, 365]    | 763<br>[544, 1070]   | 1223<br>[888, 1685]  | <0.001 |
| <b>RANTES</b>                     | 36<br>[29, 46]       | 26<br>[20, 32]       | 19<br>[15, 24]       | 26<br>[19, 36]       | 31<br>[23, 41]       | <0.001 |
| <b>SDF-1a</b>                     | 1656<br>[1257, 2182] | 1218<br>[929, 1596]  | 1184<br>[897, 1561]  | 2835<br>[1993, 4033] | 3749<br>[2695, 5214] | <0.001 |
| <b>Interferons</b>                |                      |                      |                      |                      |                      |        |
| <b>IFNa</b>                       | 0.13<br>[0.03, 0.23] | 0.08<br>[0.01, 0.18] | 0.02<br>[0.06, 0.12] | 0.01<br>[0.10, 0.13] | 0.20<br>[0.07, 0.33] | 0.113  |
| <b>IFNg</b>                       | 31<br>[21, 46]       | 57<br>[39, 83]       | 53<br>[36, 78]       | 112<br>[73, 171]     | 114<br>[76, 173]     | <0.001 |
| <b>Tumor necrosis factors</b>     |                      |                      |                      |                      |                      |        |
| <b>TNFa</b>                       | 19<br>[14, 25]       | 27<br>[20, 35]       | 21<br>[16, 28]       | 42<br>[30, 59]       | 48<br>[34, 66]       | <0.001 |
| <b>TNFb</b>                       | 0.26<br>[0.06, 0.50] | 0.09<br>[0.08, 0.30] | 0.12<br>[0.06, 0.33] | 0.03<br>[0.16, 0.25] | 0.07<br>[0.11, 0.30] | 0.096  |
| <b>Colony stimulating factors</b> |                      |                      |                      |                      |                      |        |
| <b>GM-CSF</b>                     | 13<br>[7, 24]        | 15<br>[8, 27]        | 8<br>[4, 15]         | 24<br>[12, 48]       | 32<br>[16, 62]       | <0.001 |

Data are shown as average values and 95% confidence intervals (in brackets), estimated by linear mixed effect model for repeated measures. The p-values refer to the change over time and were assessed using ANOVA.

**Supplementary Table 5. Cytokine levels assessed in perfusate samples at various time points during NMP (n=26 donor livers subjected to NMP): differences between donation after brain death (DBD, n=18) and donation after circulatory death (DCD, n=8).**

| <b>Cytokine</b>     | <b>1 h<br/>(pg/ml)<br/>average<br/>value [95%<br/>CI]</b> | <b>4 h<br/>(pg/ml)<br/>average<br/>value<br/>[95% CI]</b> | <b>6 h<br/>(pg/ml)<br/>average<br/>value<br/>[95% CI]</b> | <b>12 h<br/>(pg/ml)<br/>average value<br/>[95% CI]</b> | <b>24 h<br/>(pg/ml)<br/>average value<br/>[95% CI]</b> | <b>p-<br/>value</b> |
|---------------------|-----------------------------------------------------------|-----------------------------------------------------------|-----------------------------------------------------------|--------------------------------------------------------|--------------------------------------------------------|---------------------|
| <b>Interleukins</b> |                                                           |                                                           |                                                           |                                                        |                                                        |                     |
| <b>IL-1a</b>        |                                                           |                                                           |                                                           |                                                        |                                                        |                     |
| DBD                 | 2<br>[1, 5]                                               | 8<br>[4, 15]                                              | 5<br>[2, 10]                                              | 9<br>[4, 18]                                           | 18<br>[9, 34]                                          | 0.661               |
| DCD                 | 2<br>[0, 5]                                               | 4<br>[1, 12]                                              | 5<br>[1, 14]                                              | 13<br>[4, 34]                                          | 15<br>[5, 39]                                          |                     |
| <b>IL-1b</b>        |                                                           |                                                           |                                                           |                                                        |                                                        |                     |
| DBD                 | 8<br>[4, 13]                                              | 12<br>[7, 21]                                             | 11<br>[6, 19]                                             | 14<br>[7, 26]                                          | 14<br>[7, 26]                                          | 0.490               |
| DCD                 | 8<br>[3, 18]                                              | 15<br>[7, 34]                                             | 19<br>[7, 45]                                             | 19<br>[7, 50]                                          | 19<br>[7, 50]                                          |                     |
| <b>IL-2</b>         |                                                           |                                                           |                                                           |                                                        |                                                        |                     |
| DBD                 | 5<br>[2, 9]                                               | 8<br>[4, 14]                                              | 7<br>[4, 13]                                              | 11<br>[5, 23]                                          | 17<br>[8, 32]                                          | 0.549               |
| DCD                 | 3<br>[1, 9]                                               | 11<br>[4, 26]                                             | 12<br>[5, 32]                                             | 21<br>[7, 55]                                          | 28<br>[10, 74]                                         |                     |
| <b>IL-4</b>         |                                                           |                                                           |                                                           |                                                        |                                                        |                     |
| DBD                 | 12<br>[7, 19]                                             | 40<br>[25, 64]                                            | 27<br>[17, 43]                                            | 32<br>[18, 58]                                         | 57<br>[33, 97]                                         | 0.868               |
| DCD                 | 10<br>[5, 21]                                             | 35<br>[17, 69]                                            | 32<br>[14, 69]                                            | 60<br>[26, 138]                                        | 64<br>[28, 146]                                        |                     |
| <b>IL-5</b>         |                                                           |                                                           |                                                           |                                                        |                                                        |                     |
| DBD                 | 6<br>[2, 13]                                              | 3<br>[1, 8]                                               | 2<br>[0, 5]                                               | 1<br>[0, 4]                                            | 2<br>[0, 6]                                            | 0.182               |
| DCD                 | 7<br>[2, 23]                                              | 8<br>[2, 25]                                              | 5<br>[1, 19]                                              | 4<br>[0, 15]                                           | 7<br>[1, 27]                                           |                     |
| <b>IL-6</b>         |                                                           |                                                           |                                                           |                                                        |                                                        |                     |
| DBD                 | 659<br>[238, 1820]                                        | 765<br>[268, 2176]                                        | 289<br>[103, 805]                                         | 285<br>[72, 1123]                                      | 741<br>[212, 2577]                                     | 0.050               |
| DCD                 | 728<br>[149, 3528]                                        | 1087<br>[198, 5948]                                       | 1032<br>[161, 6592]                                       | 3915<br>[612, 25037]                                   | 8204<br>[1282, 52451]                                  |                     |
| <b>IL-7</b>         |                                                           |                                                           |                                                           |                                                        |                                                        |                     |
| DBD                 | 5<br>[4, 6]                                               | 8<br>[6, 10]                                              | 7<br>[6, 9]                                               | 18<br>[13, 24]                                         | 27<br>[21, 35]                                         | 0.103               |
| DCD                 | 4<br>[3, 6]                                               | 7<br>[5, 10]                                              | 9<br>[6, 13]                                              | 42<br>[28, 62]                                         | 99<br>[66, 147]                                        |                     |
| <b>IL-9</b>         |                                                           |                                                           |                                                           |                                                        |                                                        |                     |
| DBD                 | 12<br>[3, 19]                                             | 42<br>[35, 50]                                            | 31<br>[23, 38]                                            | 53<br>[43, 64]                                         | 64<br>[55, 74]                                         | 0.990               |
| DCD                 | 16                                                        | 36                                                        | 33                                                        | 61                                                     | 56                                                     |                     |



|                |                      |                      |                      |                       |                       |       |
|----------------|----------------------|----------------------|----------------------|-----------------------|-----------------------|-------|
|                | [4, 27]              | [25, 48]             | [20, 47]             | [46, 75]              | [42, 71]              |       |
| <b>IL-10</b>   |                      |                      |                      |                       |                       |       |
| DBD            | 845<br>[424, 1683]   | 912<br>[457, 1817]   | 324<br>[160, 655]    | 131<br>[59, 287]      | 187<br>[88, 397]      | 0.687 |
| DCD            | 646<br>[215, 1938]   | 646<br>[215, 1938]   | 498<br>[107, 2292]   | 1123<br>[352, 3576]   | 341<br>[107, 1089]    |       |
| <b>IL12p70</b> |                      |                      |                      |                       |                       |       |
| DBD            | 2.8<br>[2.2, 3.5]    | 3.9<br>[2.2, 3.5]    | 3.9<br>[3.2, 4.7]    | 2.2<br>[1.6, 2.9]     | 2.2<br>[1.6, 2.8]     | 0.677 |
| DCD            | 2.3<br>[1.6, 3.2]    | 4.4<br>[3.2, 5.8]    | 3.9<br>[2.7, 5.3]    | 1.7<br>[1, 2.6]       | 2.4<br>[1.5, 3.6]     |       |
| <b>IL-13</b>   |                      |                      |                      |                       |                       |       |
| DBD            | 8<br>[5, 10]         | 8 [6, 11]            | 7<br>[5, 9]          | 12<br>[9, 18]         | 15<br>[11, 21]        | 0.548 |
| DCD            | 6<br>[4, 10]         | 6 [4, 10]            | 6<br>[3, 10]         | 15<br>[9, 24]         | 15<br>[9, 26]         |       |
| <b>IL-15</b>   |                      |                      |                      |                       |                       |       |
| DBD            | 0.86<br>[0.38, 1.51] | 0.52<br>[0.13, 1.03] | 0.22<br>[0.08, 0.63] | 0.11<br>[0.22, 0.59]  | 0.11<br>[0.21, 0.55]  | 0.820 |
| DCD            | 0.82<br>[0.17, 1.82] | 0.57<br>[0.01, 1.43] | 0.36<br>[0.17, 1.21] | 0.46<br>[0.13, 1.46]  | 0.02<br>[0.39, 0.72]  |       |
| <b>IL-17a</b>  |                      |                      |                      |                       |                       |       |
| DBD            | 2.35<br>[1.17, 4.18] | 2.85<br>[1.51, 4.90] | 2.45<br>[1.26, 4.28] | 5.27<br>[2.80, 9.35]  | 6.26<br>[3.51, 10.68] | 0.657 |
| DCD            | 1.56<br>[0.35, 3.86] | 2.17<br>[0.67, 5.03] | 1.71<br>[0.35, 4.42] | 5.86<br>[2.30, 13.25] | 7.07<br>[2.89, 15.75] |       |
| <b>IL-18</b>   |                      |                      |                      |                       |                       |       |
| DBD            | 401<br>[265, 607]    | 573<br>[379, 864]    | 490<br>[325, 739]    | 730<br>[467, 1141]    | 819<br>[531, 1265]    | 0.830 |
| DCD            | 452<br>[243, 838]    | 503<br>[271, 933]    | 511<br>[268, 972]    | 567<br>[293, 1098]    | 568<br>[293, 1100]    |       |
| <b>IL-21</b>   |                      |                      |                      |                       |                       |       |
| DBD            | 7<br>[2, 20]         | 3<br>[1, 10]         | 2<br>[0, 6]          | 3<br>[0, 10]          | 4<br>[1, 13]          | 0.802 |
| DCD            | 7<br>[1, 34]         | 6<br>[1, 28]         | 1<br>[1, 8]          | 8<br>[1, 41]          | 5<br>[0, 29]          |       |
| <b>IL-22</b>   |                      |                      |                      |                       |                       |       |
| DBD            | 16<br>[5, 45]        | 21<br>[7, 57]        | 17<br>[6, 46]        | 11<br>[3, 37]         | 24<br>[7, 72]         | 0.314 |
| DCD            | 6<br>[1, 27]         | 16<br>[3, 73]        | 8<br>[1, 43]         | 3<br>[0, 20]          | 6<br>[0, 34]          |       |
| <b>IL-23</b>   |                      |                      |                      |                       |                       |       |
| DBD            | 0.47<br>[0.01, 1.17] | 0.91<br>[0.30, 1.81] | 1.92<br>[1.00, 3.25] | 0.14<br>[0.30, 0.87]  | 0.38<br>[0.12, 1.18]  | 0.484 |
| DCD            | 0.52<br>[0.15, 1.70] | 0.87<br>[0.05, 2.33] | 0.73<br>[0.10, 2.32] | 0.02<br>[0.52, 0.98]  | 0.02<br>[0.52, 0.98]  |       |
| <b>IL-27</b>   |                      |                      |                      |                       |                       |       |
| DBD            | 5<br>[2, 10]         | 14<br>[7, 27]        | 15<br>[8, 27]        | 30<br>[14, 66]        | 35<br>[17, 72]        | 0.427 |
| DCD            | 4                    | 9                    | 9                    | 36                    | 35                    |       |

|                   |                      |                      |                      |                       |                       |       |
|-------------------|----------------------|----------------------|----------------------|-----------------------|-----------------------|-------|
|                   | [0, 7]               | [3, 23]              | [3, 27]              | [11, 109]             | [11, 105]             |       |
| <b>IL-31</b>      |                      |                      |                      |                       |                       |       |
| DBD               | 0.54<br>[0.20, 0.98] | 0.13<br>[0.12, 0.44] | 0.04<br>[0.18, 0.33] | 0.01<br>[0.28, 0.37]  | 0.06<br>[0.21, 0.43]  | 0.942 |
| DCD               | 0.57<br>[0.09, 1.26] | 0.10<br>[0.24, 0.58] | 0.02<br>[0.36, 0.48] | 0.02<br>[0.38, 0.54]  | 0.12<br>[0.29, 0.77]  |       |
| <b>Chemokines</b> |                      |                      |                      |                       |                       |       |
| <b>Eotaxin</b>    |                      |                      |                      |                       |                       |       |
| DBD               | 39<br>[24, 63]       | 34<br>[21, 55]       | 27<br>[17, 43]       | 71<br>[39, 129]       | 100<br>[57, 173]      | 0.481 |
| DCD               | 38<br>[9, 38]        | 17<br>[8, 35]        | 17<br>[7, 39]        | 111<br>[47, 261]      | 353<br>[150, 828]     |       |
| <b>GROa</b>       |                      |                      |                      |                       |                       |       |
| DBD               | 17<br>[9, 32]        | 185<br>[101, 336]    | 76<br>[41, 140]      | 154<br>[73, 320]      | 474<br>[239, 936]     | 0.390 |
| DCD               | 19<br>[7, 47]        | 152<br>[63, 366]     | 181<br>[63, 518]     | 606<br>[211, 1737]    | 651<br>[227, 1863]    |       |
| <b>IL-8</b>       |                      |                      |                      |                       |                       |       |
| DBD               | 243<br>[143, 411]    | 2478<br>[1391, 4415] | 1424<br>[660, 3070]  | 3945<br>[1844, 8441]  | 5271<br>[2751, 10099] | 0.753 |
| DCD               | 288<br>[133, 619]    | 1241<br>[472, 3260]  | 1077<br>[126, 9124]  | 5347<br>[2035, 14044] | 4297<br>[1635, 11286] |       |
| <b>IP-10</b>      |                      |                      |                      |                       |                       |       |
| DBD               | 132<br>[79, 218]     | 239<br>[146, 391]    | 147<br>[89, 241]     | 591<br>[318, 1099]    | 900<br>[506, 1602]    | 0.724 |
| DCD               | 109<br>[52, 229]     | 202<br>[96, 422]     | 294<br>[128, 673]    | 738<br>[302, 1799]    | 1280<br>[525, 3120]   |       |
| <b>MCP-1</b>      |                      |                      |                      |                       |                       |       |
| DBD               | 1585<br>[1128, 2227] | 3656<br>[2556, 5231] | 1890<br>[1189, 3003] | 6191<br>[3893, 9845]  | 5071<br>[3426, 7504]  | 0.219 |
| DCD               | 1481<br>[899, 2438]  | 1567<br>[853, 2875]  | 1614<br>[659, 3950]  | 5505<br>[2994, 10121] | 3672<br>[1997, 6751]  |       |
| <b>MIP-1a</b>     |                      |                      |                      |                       |                       |       |
| DBD               | 69<br>[49, 99]       | 51<br>[36, 72]       | 39<br>[27, 55]       | 89<br>[58, 137]       | 150<br>[101, 225]     | 0.483 |
| DCD               | 57<br>[34, 97]       | 33<br>[19, 56]       | 24<br>[13, 43]       | 88<br>[47, 163]       | 289<br>[155, 535]     |       |
| <b>MIP-1b</b>     |                      |                      |                      |                       |                       |       |
| DBD               | 294<br>[210, 411]    | 382<br>[275, 529]    | 272<br>[197, 375]    | 675<br>[445, 1024]    | 1128<br>[767, 1658]   | 0.901 |
| DCD               | 227<br>[139, 371]    | 290<br>[178, 473]    | 308<br>[177, 536]    | 979<br>[539, 1777]    | 1498<br>[825, 2719]   |       |
| <b>RANTES</b>     |                      |                      |                      |                       |                       |       |
| DBD               | 36<br>[27, 47]       | 27<br>[20, 35]       | 18<br>[13, 23]       | 23<br>[16, 33]        | 26<br>[19, 36]        | 0.287 |
| DCD               | 38<br>[25, 58]       | 23<br>[15, 36]       | 25<br>[15, 40]       | 36<br>[21, 60]        | 48<br>[29, 81]        |       |
| <b>SDF-1a</b>     |                      |                      |                      |                       |                       |       |
| DBD               | 1632                 | 1151                 | 1178                 | 2548                  | 3439                  | 0.410 |

|                                   |                          |                      |                      |                      |                      |       |
|-----------------------------------|--------------------------|----------------------|----------------------|----------------------|----------------------|-------|
|                                   | [1150, 2314<br>]         | [820, 1615]          | [847, 1639]          | [1626, 3992]         | [2289, 5165]         |       |
| DCD                               | 1708<br>[1058, 2757<br>] | 1364<br>[845, 2202]  | 1201<br>[691, 2085]  | 3402<br>[1860, 6220] | 4458<br>[2438, 8149] |       |
| <b>Interferons</b>                |                          |                      |                      |                      |                      |       |
| <b>IFNa</b>                       |                          |                      |                      |                      |                      |       |
| DBD                               | 0.07<br>[0.04, 0.19]     | 0.08<br>[0.03, 0.20] | 0.02<br>[0.08, 0.13] | 0.00<br>[0.13, 0.15] | 0.27<br>[0.11, 0.44] | 0.704 |
| DCD                               | 0.26<br>[0.08, 0.47]     | 0.09<br>[0.07, 0.27] | 0.04<br>[0.13, 0.25] | 0.02<br>[0.17, 0.24] | 0.04<br>[0.14, 0.27] |       |
| <b>IFNg</b>                       |                          |                      |                      |                      |                      |       |
| DBD                               | 32<br>[20, 51]           | 66<br>[42, 103]      | 57<br>[36, 89]       | 131<br>[78, 220]     | 132<br>[80, 217]     | 0.357 |
| DCD                               | 29<br>[14, 57]           | 41<br>[21, 81]       | 46<br>[22, 95]       | 80<br>[37, 172]      | 82<br>[38, 176]      |       |
| <b>Tumor necrosis factors</b>     |                          |                      |                      |                      |                      |       |
| <b>TNFa</b>                       |                          |                      |                      |                      |                      |       |
| DBD                               | 18 [13, 26]              | 26<br>[19, 37]       | 20<br>[14, 28]       | 39<br>[25, 60]       | 45<br>[30, 67]       | 0.525 |
| DCD                               | 20 [12, 34]              | 28<br>[17, 46]       | 24<br>[13, 42]       | 49<br>[26, 90]       | 56<br>[30, 104]      |       |
| <b>TNFb</b>                       |                          |                      |                      |                      |                      |       |
| DBD                               | 0.29<br>[0.04, 0.60]     | 0.13<br>[0.08, 0.40] | 0.17<br>[0.05, 0.45] | 0.06<br>[0.17, 0.35] | 0.12<br>[0.11, 0.41] | 0.476 |
| DCD                               | 0.20<br>[0.12, 0.65]     | 0.00<br>[0.27, 0.37] | 0.02<br>[0.31, 0.37] | 0.04<br>[0.33, 0.37] | 0.04<br>[0.33, 0.37] |       |
| <b>Colony stimulating factors</b> |                          |                      |                      |                      |                      |       |
| <b>GM-CSF</b>                     |                          |                      |                      |                      |                      |       |
| DBD                               | 14<br>[6, 30]            | 16<br>[7, 33]        | 8<br>[4, 17]         | 19<br>[8, 46]        | 30<br>[13, 68]       | 0.949 |
| DCD                               | 10<br>[3, 32]            | 12<br>[4, 37]        | 8<br>[2, 29]         | 36<br>[10, 124]      | 36<br>[10, 123]      |       |

Data are shown as average values and 95% confidence intervals (in brackets), estimated by linear mixed effect model for repeated measures. The p-values refer to the difference between DBD and DCD and were assessed using ANOVA.

**Supplementary Table 6. Cytokine levels assessed in perfusate samples at various time points during NMP (n=26 donor livers subjected to NMP): differences between transplanted (n=18) and discarded (n=8) livers.**

| <b>Cytokine</b>     | <b>1 h<br/>(pg/ml)<br/>average<br/>value [95%<br/>CI]</b> | <b>4 h<br/>(pg/ml)<br/>average<br/>value<br/>[95% CI]</b> | <b>6 h<br/>(pg/ml)<br/>average<br/>value<br/>[95% CI]</b> | <b>12 h<br/>(pg/ml)<br/>average<br/>value<br/>[95% CI]</b> | <b>24 h<br/>(pg/ml)<br/>average value<br/>[95% CI]</b> | <b>p-<br/>value</b> |
|---------------------|-----------------------------------------------------------|-----------------------------------------------------------|-----------------------------------------------------------|------------------------------------------------------------|--------------------------------------------------------|---------------------|
| <b>Interleukins</b> |                                                           |                                                           |                                                           |                                                            |                                                        |                     |
| <b>IL-1a</b>        |                                                           |                                                           |                                                           |                                                            |                                                        |                     |
| Transplanted        | 2<br>[1, 5]                                               | 7<br>[4, 14]                                              | 5<br>[2, 9]                                               | 8<br>[4, 16]                                               | 16<br>[8, 32]                                          | 0.903               |
| Discarded           | 1<br>[0, 4]                                               | 5<br>[2, 14]                                              | 6<br>[2, 15]                                              | 14<br>[5, 35]                                              | 17<br>[6, 42]                                          |                     |
| <b>IL-1b</b>        |                                                           |                                                           |                                                           |                                                            |                                                        |                     |
| Transplanted        | 6<br>[3, 11]                                              | 12<br>[7, 20]                                             | 11<br>[6, 19]                                             | 10<br>[5, 20]                                              | 10<br>[5, 20]                                          | 0.092               |
| Discarded           | 12<br>[5, 26]                                             | 16<br>[7, 35]                                             | 18<br>[7, 40]                                             | 29<br>[12, 68]                                             | 27<br>[12, 62]                                         |                     |
| <b>IL-2</b>         |                                                           |                                                           |                                                           |                                                            |                                                        |                     |
| Transplanted        | 4<br>[2, 8]                                               | 7<br>[4, 12]                                              | 7<br>[4, 12]                                              | 10<br>[5, 21]                                              | 13<br>[6, 26]                                          | 0.114               |
| Discarded           | 5<br>[2, 11]                                              | 15<br>[6, 34]                                             | 14<br>[5, 33]                                             | 24<br>[9, 59]                                              | 36<br>[15, 83]                                         |                     |
| <b>IL-4</b>         |                                                           |                                                           |                                                           |                                                            |                                                        |                     |
| Transplanted        | 10<br>[6, 17]                                             | 36<br>[23, 57]                                            | 25<br>[16, 40]                                            | 30<br>[16, 54]                                             | 48<br>[27, 86]                                         | 0.213               |
| Discarded           | 14<br>[7, 29]                                             | 44<br>[22, 86]                                            | 35<br>[17, 72]                                            | 64<br>[30, 137]                                            | 82<br>[40, 166]                                        |                     |
| <b>IL-5</b>         |                                                           |                                                           |                                                           |                                                            |                                                        |                     |
| Transplanted        | 4<br>[2, 10]                                              | 3<br>[1, 7]                                               | 2<br>[0, 5]                                               | 1<br>[0, 5]                                                | 2<br>[0, 7]                                            | 0.123               |
| Discarded           | 13<br>[4, 39]                                             | 9<br>[2, 28]                                              | 5<br>[1, 18]                                              | 2<br>[0, 10]                                               | 4<br>[1, 15]                                           |                     |
| <b>IL-6</b>         |                                                           |                                                           |                                                           |                                                            |                                                        |                     |
| Transplanted        | 651<br>[241, 1761]                                        | 823<br>[312, 2170]                                        | 327<br>[120, 892]                                         | 249<br>[65, 948]                                           | 392<br>[103, 1488]                                     | 0.032               |
| Discarded           | 755<br>[160, 3536]                                        | 770<br>[103, 5735]                                        | 725<br>[118, 4449]                                        | 4478<br>[730, 27437]                                       | 9816<br>[2086, 46166]                                  |                     |
| <b>IL-7</b>         |                                                           |                                                           |                                                           |                                                            |                                                        |                     |
| Transplanted        | 4<br>[3, 6]                                               | 8<br>[6, 10]                                              | 8<br>[6, 11]                                              | 22<br>[15, 31]                                             | 31<br>[22, 43]                                         | 0.447               |
| Discarded           | 5<br>[3, 8]                                               | 8<br>[5, 13]                                              | 7<br>[4, 11]                                              | 26<br>[16, 40]                                             | 57<br>[38, 86]                                         |                     |
| <b>IL-9</b>         |                                                           |                                                           |                                                           |                                                            |                                                        |                     |
| Transplanted        | 10<br>[2, 18]                                             | 39<br>[31, 46]                                            | 29<br>[21, 37]                                            | 54<br>[43, 65]                                             | 62<br>[52, 73]                                         | 0.178               |
| Discarded           | 18<br>[7, 30]                                             | 45<br>[33, 57]                                            | 36<br>[24, 49]                                            | 58<br>[45, 72]                                             | 62<br>[49, 75]                                         |                     |

| <b>IL-10</b>   |                      |                      |                      |                       |                        |       |
|----------------|----------------------|----------------------|----------------------|-----------------------|------------------------|-------|
| Transplanted   | 762<br>[379, 1531]   | 808<br>[401, 1628]   | 302<br>[145, 627]    | 137<br>[59, 317]      | 141<br>[62, 317]       | 0.363 |
| Discarded      | 699<br>[248, 1964]   | 824<br>[270, 2510]   | 437<br>[111, 1720]   | 696<br>[228, 2124]    | 424<br>[145, 1236]     |       |
| <b>IL12p70</b> |                      |                      |                      |                       |                        |       |
| Transplanted   | 2.78<br>[2.22, 3.44] | 2.93<br>[2.37, 3.60] | 3.89<br>[3.18, 4.72] | 1.98<br>[1.39, 2.71]  | 1.88<br>[1.34, 2.54]   | 0.192 |
| Discarded      | 2.45<br>[1.73, 3.36] | 4.26<br>[3.17, 5.65] | 3.93<br>[2.84, 5.32] | 2.06<br>[1.34, 3.01]  | 2.87<br>[2.02, 3.97]   |       |
| <b>IL-13</b>   |                      |                      |                      |                       |                        |       |
| Transplanted   | 7<br>[5, 10]         | 8<br>[6, 11]         | 7<br>[5, 9]          | 12<br>[9, 18]         | 12<br>[8, 17]          | 0.807 |
| Discarded      | 7<br>[4, 11]         | 7<br>[4, 11]         | 6<br>[4, 10]         | 14<br>[9, 22]         | 21<br>[13, 33]         |       |
| <b>IL-15</b>   |                      |                      |                      |                       |                        |       |
| Transplanted   | 0.61<br>[0.20, 1.16] | 0.52<br>[0.13, 1.03] | 0.20<br>[0.11, 0.60] | 0.20<br>[0.17, 0.74]  | 0.06<br>[0.26, 0.51]   | 0.396 |
| Discarded      | 1.49<br>[0.61, 2.84] | 0.58<br>[0.02, 1.43] | 0.40<br>[0.11, 1.21] | 0.29<br>[0.20, 1.08]  | 0.16<br>[0.26, 0.83]   |       |
| <b>IL-17a</b>  |                      |                      |                      |                       |                        |       |
| Transplanted   | 2.15<br>[1.06, 3.83] | 2.44<br>[1.26, 4.25] | 2.02<br>[0.98, 3.62] | 4.06<br>[2.05, 7.42]  | 4.64<br>[2.44, 8.23]   | 0.412 |
| Discarded      | 1.97<br>[0.58, 4.59] | 3.08<br>[1.17, 6.67] | 2.73<br>[0.94, 6.18] | 8.56<br>[3.85, 17.84] | 10.46<br>[4.96, 21.04] |       |
| <b>IL-18</b>   |                      |                      |                      |                       |                        |       |
| Transplanted   | 343<br>[232, 507]    | 464<br>[315, 684]    | 395<br>[268, 584]    | 571<br>[369, 884]     | 666<br>[434, 1021]     | 0.068 |
| Discarded      | 649<br>[363, 1162]   | 807<br>[451, 1444]   | 838<br>[463, 1517]   | 996<br>[543, 1827]    | 994<br>[549, 1800]     |       |
| <b>IL-21</b>   |                      |                      |                      |                       |                        |       |
| Transplanted   | 6<br>[2, 18]         | 3<br>[1, 10]         | 2<br>[0, 7]          | 3<br>[0, 11]          | 3<br>[1, 12]           | 0.736 |
| Discarded      | 9<br>[1, 42]         | 5<br>[0, 27]         | 1<br>[1, 8]          | 6<br>[1, 32]          | 7<br>[1, 33]           |       |
| <b>IL-22</b>   |                      |                      |                      |                       |                        |       |
| Transplanted   | 18<br>[6, 50]        | 22<br>[7, 60]        | 16<br>[5, 46]        | 5<br>[1, 20]          | 14<br>[4, 45]          | 0.613 |
| Discarded      | 5<br>[0, 24]         | 15<br>[3, 69]        | 9<br>[1, 45]         | 11<br>[1, 57]         | 17<br>[3, 81]          |       |
| <b>IL-23</b>   |                      |                      |                      |                       |                        |       |
| Transplanted   | 0.19<br>[0.19, 0.75] | 0.82<br>[0.25, 1.65] | 1.78<br>[0.90, 3.05] | 0<br>[0.40, 0.65]     | 0.53<br>[0.05, 1.48]   | 0.679 |
| Discarded      | 1.38<br>[0.35, 3.17] | 1.09<br>[0.19, 2.66] | 0.29<br>[0.32, 1.42] | 0.29<br>[0.32, 1.42]  | 0.04<br>[0.47, 0.74]   |       |
| <b>IL-27</b>   |                      |                      |                      |                       |                        |       |
| Transplanted   | 4<br>[2, 8]          | 12<br>[6, 22]        | 13<br>[6, 24]        | 29<br>[12, 66]        | 28<br>[13, 61]         | 0.707 |
| Discarded      | 4<br>[1, 10]         | 14<br>[5, 36]        | 14<br>[5, 37]        | 38<br>[13, 108]       | 48<br>[18, 128]        |       |

| <b>IL-31</b>      |                      |                      |                      |                       |                       |       |
|-------------------|----------------------|----------------------|----------------------|-----------------------|-----------------------|-------|
| Transplanted      | 0.29<br>[0.02, 0.65] | 0.09<br>[0.14, 0.38] | 0.04<br>[0.18, 0.32] | 0.02<br>[0.27, 0.41]  | 0.02<br>[0.25, 0.39]  | 0.214 |
| Discarded         | 1.29<br>[0.61, 2.26] | 0.19<br>[0.16, 0.69] | 0.02<br>[0.33, 0.43] | 0.04<br>[0.36, 0.43]  | 0.19<br>[0.18, 0.74]  |       |
| <b>Chemokines</b> |                      |                      |                      |                       |                       |       |
| <b>Eotaxin</b>    |                      |                      |                      |                       |                       |       |
| Transplanted      | 37<br>[23, 59]       | 27<br>[17, 43]       | 22<br>[13, 34]       | 47<br>[26, 87]        | 68<br>[38, 121]       | 0.161 |
| Discarded         | 21<br>[10, 41]       | 28<br>[14, 55]       | 31<br>[15, 63]       | 184<br>[86, 392]      | 416<br>[204, 847]     |       |
| <b>GROa</b>       |                      |                      |                      |                       |                       |       |
| Transplanted      | 16<br>[8, 29]        | 158<br>[88, 282]     | 75<br>[41, 137]      | 129<br>[60, 277]      | 400<br>[192, 829]     | 0.084 |
| Discarded         | 24<br>[10, 59]       | 209<br>[83, 519]     | 163<br>[57, 462]     | 648<br>[246, 1704]    | 813<br>[327, 2023]    |       |
| <b>IL-8</b>       |                      |                      |                      |                       |                       |       |
| Transplanted      | 222<br>[131, 375]    | 1746<br>[983, 3100]  | 1376<br>[641, 2953]  | 3772<br>[1770, 8036]  | 5783<br>[2832, 11807] | 0.332 |
| Discarded         | 347<br>[162, 743]    | 3298<br>[1264, 8604] | 1189<br>[142, 9934]  | 6029<br>[2311, 15723] | 4194<br>[1860, 9453]  |       |
| <b>IP-10</b>      |                      |                      |                      |                       |                       |       |
| Transplanted      | 124<br>[76, 204]     | 193<br>[119, 312]    | 135<br>[83, 220]     | 554<br>[292, 1053]    | 823<br>[445, 1519]    | 0.148 |
| Discarded         | 124<br>[60, 256]     | 327<br>[158, 673]    | 348<br>[154, 782]    | 820<br>[364, 1844]    | 1411<br>[658, 3024]   |       |
| <b>MCP-1</b>      |                      |                      |                      |                       |                       |       |
| Transplanted      | 1418<br>[1000, 2009] | 2988<br>[2070, 4312] | 1510<br>[918, 2482]  | 6203<br>[3869, 9947]  | 5352<br>[3477, 8237]  | 0.751 |
| Discarded         | 1877<br>[1125, 3131] | 2853<br>[1542, 5279] | 2776<br>[1305, 5906] | 6234<br>[3369, 11532] | 3922<br>[2284, 6733]  |       |
| <b>MIP-1a</b>     |                      |                      |                      |                       |                       |       |
| Transplanted      | 64<br>[45, 92]       | 49<br>[34, 69]       | 35<br>[2, 50]        | 81<br>[51, 129]       | 144<br>[93, 223]      | 0.879 |
| Discarded         | 67<br>[40, 114]      | 36<br>[21, 61]       | 32<br>[18, 56]       | 99<br>[55, 178]       | 252<br>[145, 436]     |       |
| <b>MIP-1b</b>     |                      |                      |                      |                       |                       |       |
| Transplanted      | 312<br>[225, 435]    | 383<br>[277, 529]    | 256<br>[185, 355]    | 650<br>[423, 999]     | 1084<br>[719, 1634]   | 0.932 |
| Discarded         | 200<br>[123, 325]    | 288<br>[177, 467]    | 348<br>[209, 580]    | 947<br>[550, 1629]    | 1419<br>[851, 2363]   |       |
| <b>RANTES</b>     |                      |                      |                      |                       |                       |       |
| Transplanted      | 34<br>[25, 45]       | 25<br>[19, 34]       | 18<br>[14, 24]       | 24<br>[16, 35]        | 25<br>[17, 36]        | 0.215 |
| Discarded         | 43<br>[28, 66]       | 26<br>[17, 40]       | 21<br>[13, 34]       | 31<br>[19, 51]        | 44<br>[28, 68]        |       |
| <b>SDF-1a</b>     |                      |                      |                      |                       |                       |       |
| Transplanted      | 1806 [1274, 2562]    | 1160 [827, 1627]     | 1180 [840, 1658]     | 2735 [1700, 4401]     | 3457 [2207, 5416]     | 0.905 |

|                                   |                   |                   |                   |                   |                   |       |
|-----------------------------------|-------------------|-------------------|-------------------|-------------------|-------------------|-------|
| Discarded                         | 1411 [874, 2277]  | 1343 [832, 2167]  | 1200 [719, 2001]  | 2932 [1690, 5088] | 4104 [2462, 6842] |       |
| <b>Interferons</b>                |                   |                   |                   |                   |                   |       |
| <b>IFNa</b>                       |                   |                   |                   |                   |                   |       |
| Transplanted                      | 0.04 [0.07, 0.15] | 0.35 [0.16, 0.5]  | 0.03 [0.07, 0.14] | 0.00 [0.13, 0.16] | 0.18 [0.03, 0.35] | 0.086 |
| Discarded                         | 0.06 [0.04, 0.18] | 0.12 [0.04, 0.31] | 0.01 [0.14, 0.19] | 0.01 [0.16, 0.21] | 0.22 [0.03, 0.44] |       |
| <b>IFNg</b>                       |                   |                   |                   |                   |                   |       |
| Transplanted                      | 29 [18, 45]       | 49 [32, 77]       | 43 [27, 67]       | 85 [50, 145]      | 100 [60, 167]     | 0.140 |
| Discarded                         | 38 [19, 73]       | 78 [40, 151]      | 90 [45, 178]      | 187 [92, 378]     | 155 [78, 306]     |       |
| <b>Tumor necrosis factors</b>     |                   |                   |                   |                   |                   |       |
| <b>TNFa</b>                       |                   |                   |                   |                   |                   |       |
| Transplanted                      | 17 [12, 24]       | 24 [17, 33]       | 18 [13, 25]       | 35 [22, 54]       | 39 [26, 59]       | 0.012 |
| Discarded                         | 24 [15, 39]       | 35 [22, 57]       | 31 [19, 52]       | 60 [35, 103]      | 69 [41, 114]      |       |
| <b>TNFb</b>                       |                   |                   |                   |                   |                   |       |
| Transplanted                      | 0.16 [0.07, 0.43] | 0.13 [0.09, 0.39] | 0.17 [0.05, 0.45] | 0.08 [0.15, 0.38] | 0.09 [0.15, 0.38] | 0.910 |
| Discarded                         | 0.52 [0.10, 1.08] | 0.01 [0.26, 0.39] | 0.03 [0.30, 0.35] | 0.05 [0.32, 0.33] | 0.05 [0.24, 0.46] |       |
| <b>Colony stimulating factors</b> |                   |                   |                   |                   |                   |       |
| <b>GM-CSF</b>                     |                   |                   |                   |                   |                   |       |
| Transplanted                      | 11 [5, 24]        | 13 [6, 26]        | 7 [3, 14]         | 16 [6, 40]        | 17 [7, 41]        | 0.180 |
| Discarded                         | 17 [5, 48]        | 20 [6, 57]        | 12 [4, 37]        | 45 [14, 141]      | 81 [27, 237]      |       |

Data are shown as average values and 95% confidence intervals (in brackets), estimated by linear mixed effect model for repeated measures. The p-values refer to the difference between transplanted and discarded livers and were assessed using ANOVA.

**Supplementary Table 7. Overview of all antibodies - clones, providers, dilutions, antigen retrieval (AR) and Opal fluorophore pairing used for multispectral imaging**

| Antibody                                                                        | Clone           | Provider             | Dilution        | pH (AR) | Opal Pairing |
|---------------------------------------------------------------------------------|-----------------|----------------------|-----------------|---------|--------------|
| <b>Panel 1. Multiplex imaging – phenotyping of immune cells in liver tissue</b> |                 |                      |                 |         |              |
| CD15                                                                            | MMA             | Abcam                | 1:100           | 6       | 520          |
| CD20                                                                            | L26             | Dako                 | 1:200           | 6       | 540          |
| CD8                                                                             | C8\144B         | Dako                 | 1:200           | 9       | 570          |
| CD3                                                                             | polyclonal      | Dako                 | 1:250           | 6       | 620          |
| CD68                                                                            | PG-M1           | Dako                 | 1:200           | 9       | 650          |
| Cytokeratin                                                                     | AE1/AE3<br>C-11 | Dako<br>Abcam        | 1:500<br>1:1000 | 9       | 690          |
| DAPI                                                                            | -               | Akoya<br>Biosciences | 1:15            | 7.4     | 450          |
| <b>Panel 2. CD15 CXCR2 double staining</b>                                      |                 |                      |                 |         |              |
| CXCR2                                                                           | EPR22301-103    | Abcam                | 1:1000          | 9       | 520          |
| CD15                                                                            | MMA             | Abcam                | 1:100           | 6       | 570          |
| DAPI                                                                            | -               | Akoya<br>Biosciences | 1:15            | 7.4     | 450          |



**Supplementary Table 8. Antibodies used for flow cytometry in liver tissue**

| <b>Antibody</b> | <b>Clone</b> | <b>Conjugate</b> | <b>Dilution</b> | <b>Company</b> |
|-----------------|--------------|------------------|-----------------|----------------|
| CD34            | HPCA-2       | FITC             | 1:20            | BDBiosciences  |
| 7AAD            | -            | BB700            | 1:14            | BDBiosciences  |
| CD90            | 5E10         | APC              | 1:100           | Biologend      |
| CD19            | HI98         | APC-R700         | 1:400           | BDBiosciences  |
| CD16            | eBioCB16     | APC-eF780        | 1:25            | Thermo         |
| CD56            | NCAM16.2     | BUV395           | 1:100           | BDBiosciences  |
| CD3             | UCHT         | BUV496           | 1:400           | BDBiosciences  |
| CD8             | RPA-T8       | BUV563           | 1:200           | BDBiosciences  |
| CD28            | CD28.2       | BUV615P          | 1:500           | BDBiosciences  |
| CD4             | SK3          | BUV737           | 1:200           | BDBiosciences  |
| CD45            | HI30         | BUV805           | 1:100           | BDBiosciences  |
| CD38            | HIT2         | BV421            | 1:200           | BDBiosciences  |
| HLA-DR          | G46-6        | BV480            | 1:100           | BDBiosciences  |
| CD31            | WM59         | BV605            | 1:100           | Biologend      |
| CD123           | 7G3          | BV650            | 1:200           | BDBiosciences  |
| CD14            | MφP9         | BV711            | 1:200           | BDBiosciences  |
| CD15            | HI98         | BV786            | 1:100           | BDBiosciences  |
| CD161           | DX12         | PE               | 1:40            | BDBiosciences  |
| CD193           | 5E8          | PE-CF594         | 1:167           | BDBiosciences  |
| CD326           | 9C4          | PE-Cy7           | 1:2000          | Biologend      |

**Supplementary Table 9. Antibodies used for flow cytometry in perfusate**

| <b>Antibody</b> | <b>Clone</b>      | <b>Conjugate</b>          | <b>Dilution</b>        | <b>Company</b>   |
|-----------------|-------------------|---------------------------|------------------------|------------------|
| CD1c            | F10/21A3          | BV421                     | 1:20                   | BDBiosciences    |
| CD3             | HIT3a             | BV510<br>FITC             | 1:40<br>1:20           | BDBiosciences    |
| CD4             | RPA-T4, SK3       | PE-CF594<br>BV786         | 1:100<br>1:100         | BDBiosciences    |
| CD8             | Hit8a, RPA-T8     | FITC<br>PE-CF594<br>AF700 | 1:200<br>1:250<br>1:50 | BDBiosciences    |
| CD11b           | WM59              | PE-Cy7                    | 1:250                  | BDBiosciences    |
| CD11c           | B-ly6             | BV605                     | 1:50                   | BDBiosciences    |
| CD14            | M $\psi$ P9, M5E2 | BV711<br>FITC<br>BV785    | 1:100<br>1:20<br>1:20  | BDBiosciences    |
| CD15            | HI98              | PE-CF594                  | 1:400                  | BDBiosciences    |
| CD16            | 3G8               | PE<br>BV711               | 1:200<br>1:100         | BDBiosciences    |
| CD19            | Hib19, SJ25C1     | PE-Cy7<br>BV605<br>FITC   | 1:100<br>1:100<br>1:20 | ThermoFisher, BD |
| CD20            | 2H7               | FITC                      | 1:20                   | BDBiosciences    |
| CD21            | B-ly4             | PE                        | 1:20                   | BDBiosciences    |
| CD24            | ML5               | PE-Cy7                    | 1:100                  | BDBiosciences    |
| CD25            | BC96              | BV605                     | 1:33                   | BioLegend        |
| CD27            | M-T271            | PE<br>APC                 | 1:66<br>1:20           | BDBiosciences    |
| CD28            | CD28.2            | APC                       | 1:200                  | BDBiosciences    |
| CD31            | WM59              | BV650                     | 1:2000                 | BDBiosciences    |
| CD38            | HIT2              | BV786                     | 1:100                  | BDBiosciences    |
| CD45            | 2D1               | APC-H7                    | 1:100                  | BDBiosciences    |
| CD45RA          | HI100             | BB515                     | 1:100                  | BDBiosciences    |
| CD45RO          | UCHL1             | BV650<br>APC              | 1:500<br>1:40          | BDBiosciences    |
| CD56            | NCAM162, B159     | APC<br>FITC               | 1:50<br>1:100          | BDBiosciences    |
| CD57            | NK-1              | PE-CF594                  | 1:100                  | BDBiosciences    |
| CD64            | 10.1              | BV421<br>BV605            | 1:100<br>1:100         | ThermoFisher     |
| CD66b           | G10F5             | FITC                      | 1:20                   | BDBiosciences    |
| CD69            | FN50              | BV786                     | 1:100                  | BDBiosciences    |
| CD86            | 2331              | PE-Cy7                    | 1:100                  | BDBiosciences    |
| CD103           | Ber-Act8          | PerCP-ef710<br>BV605      | 1:100<br>1:33          | ThermoFisher, BD |
| CD127           | HIL-7R-M21        | PE                        | 1:50                   | BDBiosciences    |
| CD123           | 9F5               | BV510<br>PE               | 1:100<br>1:100         | BDBiosciences    |
| CD141           | AD5-14H12         | PE                        | 1:20                   | Miltenyi         |
| CD161           | DX12              | APC                       | 1:10                   | BDBioscience     |
| CD163           | GHI/61            | BV421                     | 1:50                   | BDBioscience     |

|                    |              |                                 |                                |               |
|--------------------|--------------|---------------------------------|--------------------------------|---------------|
| CD303              | AC144        | APC                             | 1:50                           | Miltenyi      |
| CD314              | BAT221       | PE                              | 1:20                           | Miltenyi      |
| CD335              | 9E2          | BV421                           | 1:100                          | BDBioscience  |
| CCR7               | 150503       | BV421                           | 1:33                           | BDBiosciences |
| CXCR6              | 13B1ES       | BV650                           | 1:50                           | BDBiosciences |
| FoxP3              | PCH101       | APC                             | 1:20                           | ThermoFisher  |
| HLA-DR             | LN3, G46-6   | AF700<br>BV510<br>BV786<br>FITC | 1:33<br>1:250<br>1:100<br>1:50 | BDBiosciences |
| IgD                | IA6-2        | BB515                           | 1:100                          | BDBiosciences |
| IgM                | G20-127      | BV421                           | 1:100                          | BDBiosciences |
| Siglec8            | 7C9          | APC                             | 1:50                           | BioLegend     |
| TCRV $\alpha$ 7.2  | 3C10         | PE                              | 1:50                           | BioLegend     |
| $\alpha\beta$ TCR  | T10B9.1.A-31 | FITC                            | 1:20                           | BDBioscience  |
| $\gamma\delta$ TCR | 11F2         | BV650                           | 1:50                           | BDBioscience  |
